# Supplementary material for: Genome-Wide Identification of Effector Candidates With Conserved Motifs From the Wheat Leaf Rust Fungus Puccinia triticina
Source: PubMed Central journal article supplement (PMC7283542; doi:10.3389/fmicb.2020.01188), 2020-06-03
Supplement: Data_Sheet_2.pdf [file Data_Sheet_2.pdf]

**SUPPLEMENTARY TABLE S1** | Primers used in this study.

| Primer usage               | Primer Name                     | Primer sequences 5' to 3'     | PCR product | GenBank accession |
|----------------------------|---------------------------------|-------------------------------|-------------|-------------------|
|                            | Y/F/WxC-PTTG_11693 -ORF-F       | caccATGAATGCCGCTCCCTATG       | 369 bp      | OAV87608          |
|                            | Y/F/WxC-PTTG_11693 -ORF-R       | TTATTTTGCCAGCTGACTTTAT        |             |                   |
|                            | Y/F/WxC-PTTG_25643 -ORF-F       | caccATGTTTTCTCCATCATTAGTCCG   | 357 bp      | OAV98383          |
|                            | Y/F/WxC-PTTG_25643 -ORF-R       | TCAGCCGGGACTATTTGGTT          |             |                   |
|                            | Y/F/WxC-PTTG_12170 -ORF-F       | caccATGGACTTCTGGATGTCGATCA    | 363 bp      | OAV93362          |
|                            | Y/F/WxC-PTTG_12170 -ORF-R       | CTATGGGTAATGAGTCTTTGGCTG      |             |                   |
|                            | Y/F/WxC-PTTG_11739 -ORF-F       | caccATGCTCTCCGTGAAAAATTTCTT   | 441 bp      | OAV94198          |
|                            | Y/F/WxC-PTTG_11739 -ORF-R       | ATAGGCCAGCTTGCCTGATT          |             |                   |
|                            | Y/F/WxC-PTTG_12171-ORF-F        | caccATGAACTTTTCGACATCAATGAAT  | 357 bp      | OAV93363          |
|                            | Y/F/WxC-PTTG_12171-ORF-R        | CTATGGGTAATGAGTCTTTGCGG       |             |                   |
|                            | Y/F/WxC PTTG_30134 -ORF-F       | caccATGCAATTCTCTAGTTTTTTGATCC | 375 bp      | OAV86017          |
|                            | Y/F/WxC PTTG_30134 -ORF-R       | TCAACGGCGGGGATTTG             |             |                   |
|                            | Y/F/WxC-PTTG_28678 -ORF-F       | caccATGCATCATTCAAGCTTTGGG     | 372 bp      | OAV89452          |
|                            | Y/F/WxC-PTTG_28678-ORF-R        | TCAGCGCGGGCGTGC               |             |                   |
|                            | Y/F/WxC-PTTG_28615 -ORF-F       | caccATGCATCTCGGAAGCTTT        | 384 bp      | OAV89701          |
| Transient expression assay | Y/F/WxC-PTTG_28615 -ORF-R       | TCATCGGGATTTTTTCTTTCC         |             |                   |
|                            | Y/F/WxC-PTTG_26924-ORF-F        | caccATGCAGTCTTCGCCCTTCT       | 387 bp      | OAV94540          |
|                            | Y/F/WxC-PTTG_26924-ORF-R        | TCAGTTGTGATGTGATGGGGC         |             |                   |
|                            | CFEM -PTTG_04059 -ORF-F         | caccATGCTTTCCTACTCCAACACCTT   | 582 bp      | OAV87811          |
|                            | CFEM -PTTG_04059-ORF-R          | TCAGATCATCAAGAGCGAGGAA        |             |                   |
|                            | CFEM -PTTG_04062-ORF-F          | caccATGCTTCCCAATACGCTGC       | 306 bp      | OAV88434          |
|                            | CFEM -PTTG_04062-ORF-R          | TCATGCGGCAATCTTGACAC          |             |                   |
|                            | CFEM -PTTG_29032-ORF-F          | caccATGATGACCATCGCCAGCC       | 492bp       | OAV88437          |
|                            | CFEM -PTTG_29032-ORF-R          | TTACAGGGTTGAGACAATTGCC        |             |                   |
|                            | CFEM -PTTG_06086-ORF-F          | caccATGGTGCCCGTGCATGTG        | 630         | OAV90797          |
|                            | CFEM -PTTG_06086-ORF-R          | TTACTCGGTCATGTTGAAAATCAAA     |             |                   |
|                            | CFEM -PTTG_08490-ORF-F          | caccATGGGGGCGAGCCTTCTT        | 726 bp      | OAV95566          |
|                            | CFEM -PTTG_08490-ORF-R          | TCAAGCGACGATCAAAAAGGA         |             |                   |
|                            | CFEM -PTTG_01125-ORF-F          | caccATGAGCTTCTTAAGTTTGCG      | 834 bp      | OAV97705          |
|                            | CFEM -PTTG_01125-ORF-R          | CTAGACATACAAGAGGGATGAAAAT     |             |                   |
|                            | CFEM -PTTG_08198-ORF-F          | caccATGTTCTCCGAAACTCTGCC      | 675 bp      | OAV88381          |
|                            | CFEM -PTTG_08198-ORF-R          | CTAGAGGAAGAGGGAGAGTGCG        |             |                   |
|                            | PNPi-like-PTTG_00399-EcoRI-AD-F | GAATTCCTGAAAATTCGGCTAGTCATTC  | 690 bp      | OAV98351          |
|                            | PNPi-like-PTTG_00399-XhoI-AD-R  | CTCGAGGGTCATCGAGGCAATGGG      |             |                   |
|                            | PNPi-like-PTTG_07237-EcoRI-BD-F | GAATTCTCGGGCAAACTTCAGG        | 933 bp      | OAV87507          |
| Y2H assay                  | PNPi-like-PTTG_07237-PstI-BD-R  | CTGCAG GAGTATCCGAGGACCATAGAG  |             |                   |
|                            | PNPi-like-PTTG_25271-EcoRI-BD-F | GAATTCTCGCCGCTCCGACAA         | 372 bp      | OAV99722          |
|                            | PNPi-like-PTTG_25271-PstI-BD-R  | CTGCAG AACGAAGTACGCGATGCAGAT  |             |                   |
|                            | PNPi-like-PTTG_04128-EcoRI-BD-F | GAATTCACCCCTATCTACTTGAAAT     | 324 bp      | OAV89517          |

|               |                                 |                                    |        |          |
|---------------|---------------------------------|------------------------------------|--------|----------|
|               | PNPi-like-PTTG_04128-Pst1-BD-R  | CTGCAG TTGAAACTGCCACGAAATCG        |        |          |
|               | PNPi-like-PTTG_01597-EcoRI-BD-F | GAATTCAGCGTTTCAAGGCCTTCC           | 336 bp | OAV93436 |
|               | PNPi-like-PTTG_01597-Pst1-BD-R  | CTGCAG AGCCCAATGCCACGAAA           |        |          |
|               | PNPi-like-PTTG_07174-EcoRI-BD-F | GAATTCCTCCGCTACCCTCTACATCC         | 324 bp | OAV95889 |
|               | PNPi-like-PTTG_07174-Pst1-BD-R  | CTGCAG CGTCAAATCCCAAGTGATCG        |        |          |
|               | PNPi-like-PTTG_08504-Nde1-AD-F  | CATATGAAGCCACTCAACTTGAGGC          | 726 bp | OAV96694 |
|               | PNPi-like-PTTG_08504-BamH1-AD-R | GGATCCGCAGTTCCCGACCGC              |        |          |
|               | PNPi-like-PTTG_02452-Nde1-AD-F  | CATATGGCAGACCTCCAAAACCTCATC        | 777 bp | OAV99001 |
|               | PNPi-like-PTTG_02452-BamH1-AD-R | GGATCCCATGCAGACGACCACGCT           |        |          |
|               | PNPi-like-PTTG_00895-Nde1-BD-F  | CATATGATCAGCTCTGGTGAGGTACATCATCATC | 684 bp | OAV93283 |
|               | PNPi-like-PTTG_00895-Pst1-BD-R  | CTGCAG ACAGTTTGGCGATCCCGGCTT       |        |          |
|               | PNPi-like-PTTG_08503-EcoRI-AD-F | GAATTCTATTGGCCGCTTTGAGAAGTAAAG     | 972 bp | OAV96693 |
|               | PNPi-like-PTTG_08503-BamH1-AD-R | GGATCCAGAACAGTTTCCGGAGGCCG         |        |          |
|               | PNPi-like-PTTG_00398-Nde1-BD-F  | CATATGCTCGAAAAAGCCCTGCAAG          | 690 bp | OAV98350 |
|               | PNPi-like-PTTG_00398-BamH1-BD-R | GGATCCCGAGATGTTAATGGTTTCCTTCG      |        |          |
|               | PtPNPi_PTTG_03809-qRT-F         | GAATGGTCCAAGCCAGAA                 | 341 bp | OAV94594 |
|               | PtPNPi_PTTG_03809-qRT-R         | TCATCAGCGGCAATACAA                 |        |          |
|               | PNPi-like-PTTG_00399-qRT-F      | CGTCCATAGATAAACGCTCCG              | 321 bp | OAV98351 |
|               | PNPi-like-PTTG_00399-qRT-R      | CGCACTTGGGCTTTCCTG                 |        |          |
| qRT-PCR assay | PtActin-qRT-F                   | ATCCACGAGACCACCTACAACCT            | 219 bp | OAV91054 |
|               | PtActin-qRT-R                   | CAAGATAGAACCACCAATCCATAC           |        |          |
|               | Y/F/WxC-PTTG_11693-qRT-F        | AATGAAATGTTTCGACCTATGCT            | 250 bp | OAV87608 |
|               | Y/F/WxC-PTTG_11693-qRT-R        | GCCGTATCCAGTTGTAGTGCC              |        |          |
|               | Y/F/WxC-PTTG_11739-qRT-F        | TTTGACGGCTCTGTCTTGC                | 180 bp | OAV94198 |
|               | Y/F/WxC-PTTG_11739-qRT-R        | ACTCGATGTCCGGTTGTTT                |        |          |

**SUPPLEMENTARY TABLE S2** | Virulent profile of *Pt* pathotype PHTT(P).

| <b>Wheat isogenic line</b> | <b>Leaf rust phenotype</b> | <b>Designation</b> |
|----------------------------|----------------------------|--------------------|
| Lr1                        | H                          |                    |
| Lr2a                       | L                          | P                  |
| Lr2c                       | H                          |                    |
| Lr3                        | H                          |                    |
| Lr9                        | L                          |                    |
| Lr16                       | H                          | H                  |
| Lr24                       | L                          |                    |
| Lr26                       | H                          |                    |
| Lr3ka                      | H                          |                    |
| Lr11                       | H                          | T                  |
| Lr17                       | H                          |                    |
| Lr30                       | H                          |                    |
| LrB                        | H                          |                    |
| Lr10                       | H                          | T                  |
| Lr14a                      | H                          |                    |
| Lr18                       | H                          |                    |
| Lr21                       | H                          |                    |
| Lr28                       | L                          | (P)                |
| Lr39                       | H                          |                    |
| Lr42                       | H                          |                    |

**SUPPLEMENTARY TABLE S3** | Sequencing information for the transcriptome.

| <b>Sample</b> | <b>Raw reads</b> | <b>Clean reads</b> | <b>Clean bases</b> | <b>error_rate</b> | <b>Q20</b> | <b>Q30</b> | <b>GC_pct</b> |
|---------------|------------------|--------------------|--------------------|-------------------|------------|------------|---------------|
| GT_1          | 62641700         | 61621376           | 9.24G              | 0.03              | 97.25      | 92.85      | 55.04         |
| GT_2          | 60274364         | 59106856           | 8.87G              | 0.03              | 97.18      | 92.71      | 55.02         |
| GT_3          | 51066024         | 50015870           | 7.5G               | 0.03              | 96.95      | 92.24      | 54.87         |
| 4_dpi_1       | 24658448         | 23139562           | 3.47G              | 0.03              | 94.25      | 88.33      | 56.98         |
| 4_dpi_2       | 21585930         | 19689974           | 2.95G              | 0.04              | 93.55      | 87.45      | 58.07         |
| 4_dpi_3       | 38868136         | 37347224           | 5.6G               | 0.03              | 94.89      | 88.56      | 56.45         |
| 6_dpi_1       | 50796794         | 49492326           | 7.42G              | 0.03              | 96.43      | 91.5       | 54.82         |
| 6_dpi_2       | 58159750         | 56625754           | 8.49G              | 0.03              | 96.51      | 91.65      | 54.78         |
| 6_dpi_3       | 75846454         | 73981986           | 11.1G              | 0.03              | 96.69      | 91.91      | 54.38         |
| 8_dpi_1       | 66356108         | 64430044           | 9.66G              | 0.03              | 96.42      | 91.44      | 54.77         |
| 8_dpi_2       | 60202242         | 58860648           | 8.83G              | 0.03              | 96.79      | 92.16      | 54.09         |
| 8_dpi_3       | 69269956         | 67623462           | 10.14G             | 0.03              | 96.76      | 92.1       | 54.71         |

**SUPPLEMENTARY TABLE S4** | Details of the transcriptome assembly.

| sample  | total_reads | total_map        | unique_map       | multi_map     | read1_map        | read2_map        | positive_map     | negative_map     | splice_map       | unsplice_map     | proper_map       |
|---------|-------------|------------------|------------------|---------------|------------------|------------------|------------------|------------------|------------------|------------------|------------------|
| GT_1    | 61621376    | 51069014(82.88%) | 49959493(81.07%) | 1109521(1.8%) | 25055324(40.66%) | 24904169(40.41%) | 24931811(40.46%) | 25027682(40.62%) | 21789849(35.36%) | 28169644(45.71%) | 46601186(75.63%) |
| GT_2    | 59106856    | 49202742(83.24%) | 48081153(81.35%) | 1121589(1.9%) | 24142594(40.85%) | 23938559(40.5%)  | 23991045(40.59%) | 24090108(40.76%) | 21058342(35.63%) | 27022811(45.72%) | 44895330(75.96%) |
| GT_3    | 50015870    | 43306979(86.59%) | 42343215(84.66%) | 963764(1.93%) | 21295047(42.58%) | 21048168(42.08%) | 21144380(42.28%) | 21198835(42.38%) | 18254149(36.5%)  | 24089066(48.16%) | 39676962(79.33%) |
| 4_dpi_1 | 23139562    | 13421229(58.0%)  | 13238697(57.21%) | 182532(0.79%) | 6658377(28.77%)  | 6580320(28.44%)  | 6622925(28.62%)  | 6615772(28.59%)  | 5744896(24.83%)  | 7493801(32.39%)  | 12500508(54.02%) |
| 4_dpi_2 | 19689974    | 9042244(45.92%)  | 8909336(45.25%)  | 132908(0.68%) | 4468726(22.7%)   | 4440610(22.55%)  | 4456350(22.63%)  | 4452986(22.62%)  | 3849680(19.55%)  | 5059656(25.7%)   | 8418192(42.75%)  |
| 4_dpi_3 | 37347224    | 27230105(72.91%) | 26804334(71.77%) | 425771(1.14%) | 13509914(36.17%) | 13294420(35.6%)  | 13410316(35.91%) | 13394018(35.86%) | 11615406(31.1%)  | 15188928(40.67%) | 25176834(67.41%) |
| 6_dpi_1 | 49492326    | 39651152(80.12%) | 39287181(79.38%) | 363971(0.74%) | 19734600(39.87%) | 19552581(39.51%) | 19635819(39.67%) | 19651362(39.71%) | 16029244(32.39%) | 23257937(46.99%) | 36929938(74.62%) |
| 6_dpi_2 | 56625754    | 45022569(79.51%) | 44627317(78.81%) | 395252(0.7%)  | 22416094(39.59%) | 22211223(39.22%) | 22303327(39.39%) | 22323990(39.42%) | 18126739(32.01%) | 26500578(46.8%)  | 42005586(74.18%) |
| 6_dpi_3 | 73981986    | 59501095(80.43%) | 58981684(79.72%) | 519411(0.7%)  | 29616864(40.03%) | 29364820(39.69%) | 29472330(39.84%) | 29509354(39.89%) | 23976052(32.41%) | 35005632(47.32%) | 55696296(75.28%) |
| 8_dpi_1 | 64430044    | 50647510(78.61%) | 50081547(77.73%) | 565963(0.88%) | 25182242(39.08%) | 24899305(38.65%) | 25027874(38.85%) | 25053673(38.89%) | 20095961(31.19%) | 29985586(46.54%) | 47029620(72.99%) |
| 8_dpi_2 | 58860648    | 46547934(79.08%) | 46013482(78.17%) | 534452(0.91%) | 23045895(39.15%) | 22967587(39.02%) | 22992907(39.06%) | 23020575(39.11%) | 19048272(32.36%) | 26965210(45.81%) | 43393530(73.72%) |
| 8_dpi_3 | 67623462    | 54077914(79.97%) | 53431054(79.01%) | 646860(0.96%) | 26768402(39.58%) | 26662652(39.43%) | 26701830(39.49%) | 26729224(39.53%) | 21720099(32.12%) | 31710955(46.89%) | 50343984(74.45%) |

**SUPPLEMENTARY TABLE S5** | Top 100 co-upregulated DEGs.

| gene_id    | GT   | 4 dpi  | 6 dpi  | 8 dpi  | 4 dpi vs GT    | 4 dpi vs GT | 6 dpi vs GT    | 6 dpi vs GT | 8 dpi vs GT    | 8 dpi vs GT | gene_description     | SignalP |
|------------|------|--------|--------|--------|----------------|-------------|----------------|-------------|----------------|-------------|----------------------|---------|
|            | FPKM | FPKM   | FPKM   | FPKM   | log2FoldChange | padj        | log2FoldChange | padj        | log2FoldChange | padj        |                      |         |
| PTTG_25256 | 0.0  | 1092.9 | 977.2  | 39.0   | 16.2           | 4.14E-21    | 16.0           | 1.21E-27    | 11.4           | 1.10E-11    | hypothetical protein | SP      |
| PTTG_27333 | 0.0  | 8658.5 | 4382.1 | 4800.8 | 15.9           | 8.05E-27    | 14.9           | 4.99E-24    | 15.1           | 9.52E-25    | hypothetical protein | No SP   |
| PTTG_05620 | 0.0  | 691.4  | 50.9   | 69.4   | 15.0           | 2.50E-24    | 11.3           | 4.91E-10    | 11.7           | 2.03E-15    | hypothetical protein | SP      |
| PTTG_27471 | 0.0  | 1063.4 | 235.9  | 142.4  | 14.8           | 1.55E-23    | 12.7           | 4.61E-16    | 11.9           | 5.22E-16    | hypothetical protein | SP      |
| PTTG_06270 | 0.0  | 607.4  | 777.5  | 893.7  | 14.7           | 1.82E-23    | 15.0           | 5.74E-25    | 15.3           | 1.15E-25    | hypothetical protein | SP      |
| PTTG_12701 | 0.0  | 219.1  | 146.6  | 139.7  | 14.6           | 5.86E-23    | 14.0           | 1.57E-21    | 13.9           | 2.21E-21    | hypothetical protein | SP      |
| PTTG_07988 | 0.0  | 205.5  | 32.3   | 31.9   | 14.6           | 1.57E-22    | 11.9           | 8.01E-16    | 11.9           | 1.51E-14    | hypothetical protein | No SP   |
| PTTG_03405 | 0.0  | 314.9  | 223.4  | 210.4  | 14.3           | 2.77E-22    | 13.8           | 5.27E-21    | 13.8           | 6.70E-21    | hypothetical protein | SP      |
| PTTG_07543 | 0.0  | 252.2  | 18.0   | 22.2   | 14.1           | 1.67E-21    | 10.3           | 1.46E-08    | 10.6           | 7.93E-13    | hypothetical protein | SP      |
| PTTG_00528 | 0.0  | 233.5  | 361.4  | 37.7   | 13.7           | 1.13E-15    | 14.3           | 1.51E-22    | 11.1           | 1.05E-12    | hypothetical protein | No SP   |
| PTTG_07673 | 0.0  | 59.0   | 7.3    | 9.3    | 13.7           | 2.03E-20    | 10.7           | 3.32E-10    | 11.1           | 9.59E-14    | hypothetical protein | SP      |
| PTTG_08629 | 0.0  | 233.0  | 20.4   | 30.3   | 13.6           | 5.13E-20    | 10.1           | 2.76E-09    | 10.7           | 5.19E-13    | hypothetical protein | SP      |
| PTTG_01527 | 0.0  | 96.0   | 106.1  | 90.4   | 13.6           | 5.22E-20    | 13.7           | 1.73E-20    | 13.5           | 4.02E-20    | hypothetical protein | SP      |
| PTTG_28204 | 0.0  | 110.0  | 40.8   | 25.5   | 13.5           | 9.03E-20    | 12.0           | 3.14E-16    | 11.4           | 1.25E-14    | hypothetical protein | No SP   |
| PTTG_27521 | 0.0  | 513.3  | 65.3   | 57.4   | 13.4           | 1.33E-19    | 10.4           | 1.21E-09    | 10.3           | 4.33E-12    | hypothetical protein | SP      |
| PTTG_05844 | 0.0  | 152.5  | 9.7    | 12.7   | 13.3           | 3.04E-19    | 9.3            | 2.47E-07    | 9.7            | 7.38E-11    | hypothetical protein | SP      |
| PTTG_10271 | 0.3  | 3112.8 | 130.5  | 265.6  | 13.3           | 5.19E-164   | 8.7            | 4.02E-13    | 9.7            | 4.58E-88    | hypothetical protein | No SP   |
| novel.1740 | 0.0  | 74.1   | 7.7    | 5.9    | 13.2           | 5.34E-19    | 9.9            | 6.71E-11    | 9.6            | 1.36E-10    | hypothetical protein | No SP   |
| PTTG_05544 | 0.1  | 486.7  | 1263.1 | 159.6  | 13.2           | 2.36E-35    | 14.6           | 3.96E-45    | 11.6           | 1.66E-28    | hypothetical protein | SP      |
| PTTG_27959 | 0.0  | 187.5  | 14.2   | 16.0   | 13.1           | 1.45E-18    | 9.4            | 3.67E-07    | 9.6            | 1.23E-10    | hypothetical protein | SP      |
| PTTG_25812 | 0.2  | 1447.9 | 100.6  | 169.5  | 13.1           | 7.62E-19    | 9.3            | 1.33E-07    | 10.0           | 9.09E-12    | hypothetical protein | SP      |
| novel807   | 0.0  | 339.8  | 38.3   | 67.5   | 13.1           | 1.06E-18    | 9.9            | 2.31E-11    | 10.8           | 3.14E-13    | hypothetical protein | No SP   |
| novel197   | 0.0  | 399.6  | 61.8   | 65.4   | 13.1           | 3.90E-35    | 10.3           | 4.67E-22    | 10.4           | 1.09E-23    | hypothetical protein | SP      |

|            |     |        |        |        |      |          |      |           |      |          |                                      |       |
|------------|-----|--------|--------|--------|------|----------|------|-----------|------|----------|--------------------------------------|-------|
| novel1181  | 0.0 | 194.3  | 15.8   | 20.9   | 13.1 | 1.48E-18 | 9.4  | 6.64E-08  | 9.8  | 4.08E-11 | hypothetical protein                 | SP    |
| PTTG_09449 | 0.0 | 60.3   | 39.7   | 39.2   | 13.0 | 4.16E-18 | 12.4 | 3.52E-16  | 12.4 | 3.74E-17 | hypothetical protein                 | SP    |
| PTTG_26219 | 0.0 | 343.7  | 24.9   | 34.1   | 13.0 | 3.30E-18 | 9.2  | 1.38E-07  | 9.7  | 7.33E-11 | hypothetical protein                 | SP    |
| PTTG_27354 | 0.0 | 338.2  | 24.5   | 35.7   | 13.0 | 3.32E-18 | 9.2  | 5.64E-07  | 9.8  | 5.99E-11 | hypothetical protein                 | SP    |
| PTTG_27510 | 0.0 | 83.7   | 37.5   | 16.9   | 13.0 | 8.37E-18 | 11.8 | 3.71E-14  | 10.7 | 5.41E-13 | hypothetical protein                 | SP    |
| PTTG_10298 | 0.0 | 206.4  | 16.2   | 22.0   | 13.0 | 4.31E-18 | 9.3  | 2.11E-07  | 9.7  | 6.03E-11 | hypothetical protein                 | SP    |
| novel.406  | 0.0 | 68.7   | 32.8   | 32.5   | 12.9 | 4.33E-18 | 11.8 | 1.60E-15  | 11.8 | 9.38E-16 | hypothetical protein                 | No SP |
| PTTG_11744 | 0.0 | 37.4   | 67.1   | 45.7   | 12.9 | 4.46E-18 | 13.7 | 6.72E-18  | 13.2 | 1.29E-18 | hypothetical protein                 | SP    |
| PTTG_26041 | 0.0 | 74.1   | 12.2   | 20.9   | 12.9 | 4.74E-18 | 10.3 | 8.43E-12  | 11.0 | 7.87E-14 | Collagen                             | No SP |
| PTTG_03945 | 0.0 | 39.4   | 19.8   | 17.9   | 12.8 | 1.49E-17 | 11.8 | 2.18E-15  | 11.7 | 2.53E-15 | SET                                  | No SP |
| PTTG_29948 | 0.0 | 163.1  | 11.8   | 15.6   | 12.8 | 1.35E-17 | 9.0  | 5.00E-07  | 9.4  | 3.55E-10 | hypothetical protein                 | No SP |
| PTTG_11707 | 0.0 | 93.8   | 43.4   | 48.3   | 12.7 | 1.65E-17 | 11.6 | 5.04E-15  | 11.8 | 1.54E-15 | hypothetical protein                 | No SP |
| PTTG_07125 | 0.0 | 50.6   | 21.9   | 17.1   | 12.7 | 2.20E-17 | 11.5 | 1.09E-14  | 11.1 | 4.85E-14 | hypothetical protein                 | No SP |
| PTTG_25232 | 0.1 | 368.6  | 29.3   | 41.8   | 12.7 | 1.03E-17 | 9.0  | 5.78E-09  | 9.5  | 1.08E-10 | hypothetical protein                 | No SP |
| PTTG_01095 | 0.0 | 83.3   | 41.0   | 23.8   | 12.6 | 2.24E-17 | 11.6 | 4.10E-15  | 10.8 | 2.51E-13 | orotidine 5'-phosphate decarboxylase | No SP |
| PTTG_27728 | 0.0 | 46.3   | 26.9   | 30.9   | 12.6 | 2.60E-17 | 11.8 | 1.22E-15  | 12.0 | 3.11E-16 | hypothetical protein                 | No SP |
| PTTG_28975 | 0.0 | 76.1   | 45.4   | 49.5   | 12.6 | 2.71E-17 | 11.8 | 1.03E-15  | 12.0 | 4.56E-16 | hypothetical protein                 | SP    |
| novel.2003 | 0.0 | 64.9   | 25.5   | 29.8   | 12.6 | 3.92E-12 | 11.2 | 4.40E-14  | 11.5 | 1.06E-13 | hypothetical protein                 | No SP |
| PTTG_12725 | 0.0 | 125.7  | 12.5   | 19.1   | 12.6 | 3.04E-17 | 9.2  | 2.25E-09  | 9.9  | 3.64E-11 | hypothetical protein                 | No SP |
| PTTG_28380 | 0.0 | 252.2  | 87.5   | 107.1  | 12.6 | 8.36E-17 | 11.0 | 1.39E-13  | 11.3 | 1.59E-14 | hypothetical protein                 | No SP |
| PTTG_12208 | 0.0 | 67.6   | 21.9   | 16.4   | 12.5 | 6.11E-17 | 10.9 | 2.52E-13  | 10.5 | 1.43E-12 | hypothetical protein                 | No SP |
| PTTG_06717 | 0.0 | 50.3   | 8.6    | 9.6    | 12.5 | 4.14E-17 | 10.0 | 3.72E-11  | 10.1 | 9.68E-12 | hypothetical protein                 | No SP |
| PTTG_12548 | 0.0 | 93.5   | 13.4   | 19.2   | 12.5 | 4.36E-17 | 9.7  | 1.10E-10  | 10.2 | 5.08E-12 | hypothetical protein                 | No SP |
| PTTG_09706 | 0.0 | 98.7   | 10.4   | 16.6   | 12.5 | 4.70E-17 | 9.2  | 2.93E-09  | 9.9  | 2.77E-11 | hypothetical protein                 | No SP |
| PTTG_08468 | 0.2 | 1029.7 | 5951.1 | 1627.5 | 12.5 | 3.03E-71 | 15.0 | 2.80E-116 | 13.2 | 2.33E-90 | hypothetical protein                 | SP    |
| PTTG_03249 | 0.0 | 89.1   | 56.1   | 191.1  | 12.5 | 1.15E-16 | 11.8 | 1.15E-15  | 13.6 | 1.99E-20 | hypothetical protein                 | SP    |

|            |     |       |        |        |      |          |      |           |      |           |                      |       |
|------------|-----|-------|--------|--------|------|----------|------|-----------|------|-----------|----------------------|-------|
| PTTG_00174 | 0.0 | 57.8  | 6.2    | 9.1    | 12.5 | 5.53E-17 | 9.2  | 7.48E-08  | 9.8  | 4.15E-11  | hypothetical protein | No SP |
| PTTG_12066 | 0.0 | 186.1 | 154.5  | 145.0  | 12.5 | 7.65E-17 | 12.2 | 1.42E-16  | 12.1 | 2.07E-16  | hypothetical protein | SP    |
| PTTG_08542 | 0.0 | 48.4  | 5.8    | 7.7    | 12.5 | 5.77E-17 | 9.4  | 1.27E-09  | 9.8  | 4.88E-11  | hypothetical protein | No SP |
| novel.1707 | 0.0 | 48.7  | 23.2   | 23.1   | 12.5 | 1.00E-16 | 11.4 | 1.61E-14  | 11.4 | 1.53E-14  | hypothetical protein | No SP |
| PTTG_10519 | 0.0 | 44.6  | 29.8   | 28.8   | 12.4 | 1.28E-16 | 11.8 | 1.09E-15  | 11.8 | 1.21E-15  | hypothetical protein | No SP |
| PTTG_27401 | 0.0 | 115.1 | 39.9   | 25.9   | 12.4 | 1.29E-16 | 10.9 | 4.01E-13  | 10.2 | 5.51E-12  | hypothetical protein | No SP |
| PTTG_00522 | 0.1 | 584.1 | 427.9  | 15.7   | 12.4 | 1.04E-42 | 11.9 | 2.30E-43  | 7.2  | 8.04E-10  | hypothetical protein | No SP |
| PTTG_12184 | 0.0 | 56.1  | 9.5    | 11.6   | 12.4 | 1.22E-16 | 9.8  | 7.90E-11  | 10.1 | 1.02E-11  | hypothetical protein | No SP |
| novel.562  | 0.0 | 68.8  | 8.1    | 7.3    | 12.3 | 1.77E-16 | 9.2  | 1.64E-09  | 9.1  | 1.23E-09  | hypothetical protein | No SP |
| PTTG_08305 | 0.0 | 36.4  | 15.3   | 13.6   | 12.3 | 1.31E-16 | 11.1 | 8.33E-14  | 10.9 | 1.40E-13  | hypothetical protein | No SP |
| PTTG_11740 | 0.1 | 295.5 | 230.3  | 170.4  | 12.3 | 8.20E-32 | 12.0 | 1.19E-30  | 11.5 | 1.05E-28  | hypothetical protein | No SP |
| PTTG_07972 | 0.0 | 73.8  | 33.3   | 30.7   | 12.3 | 2.00E-16 | 11.2 | 4.73E-14  | 11.1 | 7.21E-14  | hypothetical protein | No SP |
| PTTG_01596 | 0.0 | 43.7  | 3.9    | 4.9    | 12.3 | 8.24E-16 | 8.8  | 1.46E-08  | 9.2  | 8.07E-10  | MFS_1                | No SP |
| PTTG_01252 | 0.2 | 834.5 | 2312.8 | 2624.0 | 12.3 | 4.72E-11 | 13.8 | 6.51E-136 | 14.0 | 8.38E-140 | protein NMT1         | No SP |
| PTTG_26988 | 0.0 | 63.9  | 3.1    | 4.2    | 12.3 | 2.16E-16 | 7.9  | 7.95E-07  | 8.4  | 3.16E-08  | hypothetical protein | No SP |
| PTTG_11745 | 0.0 | 24.9  | 21.4   | 17.8   | 12.3 | 2.31E-16 | 12.0 | 6.40E-16  | 11.8 | 1.58E-15  | hypothetical protein | No SP |
| PTTG_06182 | 0.0 | 27.3  | 178.4  | 134.5  | 12.2 | 3.45E-16 | 14.9 | 4.29E-24  | 14.5 | 4.11E-23  | hypothetical protein | No SP |
| PTTG_02710 | 0.0 | 93.9  | 215.1  | 157.8  | 12.2 | 1.17E-16 | 13.4 | 4.35E-20  | 13.0 | 6.75E-19  | Cys_Met_Meta_PP      | No SP |
| PTTG_06906 | 0.0 | 25.2  | 2.2    | 2.7    | 12.2 | 6.66E-16 | 8.7  | 3.57E-08  | 9.0  | 1.96E-09  | hypothetical protein | No SP |
| PTTG_08879 | 0.0 | 35.2  | 22.5   | 25.4   | 12.2 | 6.46E-16 | 11.5 | 6.60E-15  | 11.7 | 2.14E-15  | AA_permease          | No SP |
| novel.1399 | 0.0 | 48.7  | 2.0    | 3.5    | 12.2 | 4.06E-16 | 7.6  | 1.47E-06  | 8.4  | 2.94E-08  | hypothetical protein | No SP |
| PTTG_28256 | 0.0 | 78.1  | 16.7   | 17.3   | 12.2 | 6.62E-16 | 9.9  | 4.48E-11  | 10.0 | 1.80E-11  | hypothetical protein | No SP |
| PTTG_01085 | 0.0 | 27.5  | 6.2    | 6.8    | 12.1 | 5.28E-16 | 10.0 | 2.83E-11  | 10.1 | 1.23E-11  | hypothetical protein | No SP |
| PTTG_27353 | 0.0 | 178.9 | 15.2   | 19.7   | 12.1 | 1.44E-15 | 8.5  | 5.27E-08  | 8.9  | 2.49E-09  | hypothetical protein | No SP |
| PTTG_05441 | 0.0 | 78.0  | 173.9  | 148.9  | 12.1 | 4.53E-16 | 13.2 | 2.84E-19  | 13.0 | 5.78E-19  | Sugar_tr             | No SP |
| PTTG_01087 | 0.0 | 25.1  | 2.8    | 3.7    | 12.0 | 1.08E-15 | 8.8  | 3.60E-07  | 9.3  | 5.02E-10  | hypothetical protein | No SP |



|             |     |       |       |       |      |          |      |          |      |          |                      |       |
|-------------|-----|-------|-------|-------|------|----------|------|----------|------|----------|----------------------|-------|
| PTTG_12594  | 0.0 | 26.8  | 14.1  | 13.1  | 12.0 | 1.57E-15 | 11.1 | 7.18E-14 | 11.0 | 1.16E-13 | hypothetical protein | No SP |
| novel.1687- | 0.0 | 38.4  | 20.3  | 20.3  | 12.0 | 1.16E-15 | 11.1 | 7.46E-14 | 11.1 | 6.71E-14 | hypothetical protein | No SP |
| PTTG_03152  | 0.0 | 186.0 | 32.3  | 35.8  | 12.0 | 2.21E-30 | 9.5  | 5.18E-19 | 9.6  | 2.76E-20 | hypothetical protein | No SP |
| PTTG_11755  | 0.0 | 56.3  | 22.6  | 13.0  | 12.0 | 1.16E-15 | 10.7 | 7.07E-13 | 9.9  | 3.25E-11 | Ferric_reduct        | No SP |
| PTTG_12002  | 0.0 | 28.4  | 12.3  | 11.5  | 11.9 | 2.36E-15 | 10.7 | 7.01E-13 | 10.6 | 7.05E-13 | hypothetical protein | No SP |
| PTTG_12004  | 0.0 | 38.1  | 15.4  | 13.3  | 11.9 | 1.79E-15 | 10.6 | 9.47E-13 | 10.4 | 2.29E-12 | hypothetical protein | No SP |
| PTTG_12769  | 0.0 | 46.2  | 4.7   | 5.8   | 11.9 | 2.27E-15 | 8.6  | 6.03E-08 | 8.9  | 2.42E-09 | hypothetical protein | No SP |
| PTTG_27172  | 0.0 | 68.0  | 32.5  | 23.4  | 11.9 | 3.28E-15 | 10.8 | 4.15E-13 | 10.3 | 3.15E-12 | hypothetical protein | No SP |
| PTTG_29929  | 0.0 | 41.2  | 5.8   | 8.3   | 11.9 | 2.31E-15 | 9.0  | 3.28E-09 | 9.6  | 1.36E-10 | hypothetical protein | No SP |
| PTTG_04622  | 0.0 | 25.9  | 13.6  | 19.1  | 11.8 | 3.56E-15 | 10.9 | 1.69E-13 | 11.4 | 1.06E-14 | hypothetical protein | No SP |
| PTTG_12723  | 0.0 | 36.8  | 12.0  | 10.0  | 11.8 | 6.93E-15 | 10.2 | 8.15E-12 | 9.9  | 2.00E-11 | hypothetical protein | No SP |
| PTTG_12348  | 0.0 | 31.2  | 18.4  | 21.8  | 11.8 | 3.31E-15 | 11.0 | 1.11E-13 | 11.3 | 1.89E-14 | hypothetical protein | No SP |
| PTTG_26831  | 0.0 | 223.5 | 207.5 | 201.4 | 11.8 | 5.84E-15 | 11.7 | 2.36E-15 | 11.7 | 2.56E-15 | hypothetical protein | No SP |
| PTTG_12568  | 0.0 | 142.1 | 11.5  | 13.2  | 11.8 | 5.74E-15 | 8.1  | 1.29E-07 | 8.3  | 2.96E-08 | hypothetical protein | No SP |
| novel.1235  | 0.0 | 49.9  | 19.9  | 26.5  | 11.7 | 6.29E-15 | 10.4 | 2.75E-12 | 10.8 | 2.54E-13 | hypothetical protein | No SP |
| PTTG_11940  | 0.0 | 35.2  | 139.7 | 36.7  | 11.7 | 4.23E-15 | 13.7 | 6.68E-21 | 11.8 | 9.57E-16 | hypothetical protein | No SP |
| PTTG_03185  | 0.0 | 29.2  | 22.0  | 17.0  | 11.7 | 1.97E-14 | 11.3 | 2.82E-14 | 10.9 | 1.62E-13 | hypothetical protein | No SP |
| PTTG_12474  | 0.0 | 52.8  | 7.3   | 9.7   | 11.7 | 9.15E-15 | 8.8  | 8.34E-09 | 9.2  | 7.43E-10 | hypothetical protein | No SP |
| novel.256   | 0.0 | 33.6  | 6.9   | 7.1   | 11.7 | 1.38E-14 | 9.4  | 1.28E-09 | 9.4  | 2.44E-10 | hypothetical protein | No SP |
| PTTG_26601  | 0.0 | 34.4  | 56.6  | 59.1  | 11.7 | 2.42E-14 | 12.4 | 4.93E-17 | 12.4 | 2.97E-17 | hypothetical protein | SP    |
| PTTG_28724  | 0.0 | 20.1  | 2.1   | 3.3   | 11.7 | 7.94E-15 | 8.4  | 1.20E-07 | 9.0  | 1.57E-09 | hypothetical protein | No SP |
| PTTG_12231  | 0.0 | 56.2  | 29.4  | 33.1  | 11.7 | 2.30E-14 | 10.7 | 5.14E-13 | 10.9 | 1.78E-13 | hypothetical protein | No SP |
| novel.1754  | 0.0 | 41.6  | 21.9  | 25.0  | 11.6 | 1.03E-14 | 10.7 | 4.88E-13 | 10.9 | 1.69E-13 | hypothetical protein | No SP |
| novel.563   | 0.0 | 36.5  | 18.3  | 13.4  | 11.6 | 1.66E-14 | 10.6 | 8.63E-13 | 10.2 | 7.60E-12 | hypothetical protein | No SP |

**SUPPLEMENTARY TABLE S6 | Top 100 co-downregulated DEGs.**

| <b>gene_id</b> | <b>GT</b>   | <b>4 dpi</b> | <b>6 dpi</b> | <b>8 dpi</b> | <b>4 dpi vs GT</b>    | <b>4 dpi vs GT</b> | <b>6 dpi vs GT</b>    | <b>6 dpi vs GT</b> | <b>8 dpi vs GT</b>    | <b>8 dpi vs GT</b> | <b>gene_description</b> |
|----------------|-------------|--------------|--------------|--------------|-----------------------|--------------------|-----------------------|--------------------|-----------------------|--------------------|-------------------------|
|                | <b>FPKM</b> | <b>FPKM</b>  | <b>FPKM</b>  | <b>FPKM</b>  | <b>log2FoldChange</b> | <b>padj</b>        | <b>log2FoldChange</b> | <b>padj</b>        | <b>log2FoldChange</b> | <b>padj</b>        |                         |
| novel.770      | 141.3       | 0.1          | 12.2         | 13.9         | -11.0                 | 8.96E-15           | -3.5                  | 6.96E-98           | -3.3                  | 4.03E-184          | hypothetical protein    |
| PTTG_12720     | 30.9        | 0.0          | 0.0          | 1.2          | -10.9                 | 3.38E-13           | -9.9                  | 1.60E-59           | -4.6                  | 7.72E-174          | hypothetical protein    |
| novel.1685     | 26.6        | 0.0          | 0.4          | 2.5          | -10.5                 | 2.65E-12           | -6.1                  | 1.06E-153          | -3.4                  | 7.80E-136          | hypothetical protein    |
| PTTG_28793     | 105.2       | 0.1          | 1.0          | 12.1         | -10.2                 | 5.04E-13           | -6.7                  | 1.02E-277          | -3.1                  | 5.32E-98           | hypothetical protein    |
| PTTG_29556     | 39.3        | 0.0          | 2.2          | 3.6          | -9.8                  | 9.60E-11           | -4.1                  | 1.56E-69           | -3.4                  | 1.15E-92           | hypothetical protein    |
| PTTG_25387     | 9.8         | 0.0          | 0.2          | 0.9          | -9.4                  | 6.63E-10           | -5.6                  | 8.49E-88           | -3.4                  | 1.80E-57           | hypothetical protein    |
| PTTG_27330     | 245.4       | 0.4          | 0.4          | 0.6          | -9.2                  | 2.05E-59           | -9.3                  | 0                  | -8.7                  | 0                  | hypothetical protein    |
| novel.640      | 41.1        | 0.0          | 0.2          | 2.0          | -9.0                  | 4.97E-09           | -7.3                  | 9.52E-46           | -4.3                  | 2.14E-10           | hypothetical protein    |
| PTTG_27458     | 431.5       | 0.8          | 0.3          | 4.7          | -9.0                  | 5.23E-13           | -10.3                 | 2.59E-131          | -6.5                  | 0                  | hypothetical protein    |
| PTTG_28830     | 13.4        | 0.0          | 0.8          | 0.8          | -8.9                  | 8.44E-09           | -4.0                  | 1.70E-55           | -4.0                  | 1.33E-67           | hypothetical protein    |
| PTTG_04752     | 129.9       | 0.3          | 0.1          | 1.1          | -8.8                  | 1.12E-54           | -10.0                 | 2.07E-236          | -6.9                  | 0                  | hypothetical protein    |
| PTTG_12496     | 497.2       | 1.1          | 0.7          | 9.0          | -8.8                  | 1.27E-187          | -9.5                  | 2.15E-77           | -5.8                  | 0                  | Abhydrolase_2           |
| PTTG_12292     | 37.2        | 0.1          | 4.4          | 6.3          | -8.7                  | 2.35E-16           | -3.1                  | 1.34E-60           | -2.5                  | 1.92E-117          | hypothetical protein    |
| PTTG_02548     | 2465.5      | 6.1          | 1.2          | 4.6          | -8.7                  | 0                  | -10.9                 | 2.44E-31           | -9.0                  | 0                  | hypothetical protein    |
| PTTG_12435     | 5314.1      | 13.8         | 6.8          | 106.2        | -8.6                  | 0                  | -9.6                  | 1.34E-165          | -5.6                  | 0                  | hypothetical protein    |
| PTTG_26026     | 23.2        | 0.0          | 0.1          | 2.2          | -8.5                  | 4.21E-08           | -8.1                  | 9.02E-26           | -3.4                  | 9.94E-38           | hypothetical protein    |
| PTTG_31124     | 5991.3      | 16.7         | 81.1         | 467.1        | -8.5                  | 1.21E-295          | -6.2                  | 1.76E-281          | -3.6                  | 0                  | hypothetical protein    |
| PTTG_06135     | 672.1       | 1.9          | 3.6          | 17.4         | -8.5                  | 2.33E-303          | -7.5                  | 0                  | -5.2                  | 0                  | hypothetical protein    |
| PTTG_29261     | 806.1       | 2.3          | 1.3          | 24.9         | -8.5                  | 6.54E-57           | -9.2                  | 8.63E-50           | -5.0                  | 0                  | hypothetical protein    |
| PTTG_08941     | 7103.1      | 21.8         | 4.1          | 123.4        | -8.3                  | 1.92E-59           | -10.7                 | 7.27E-41           | -5.8                  | 0                  | hypothetical protein    |
| PTTG_12086     | 563.0       | 1.7          | 0.8          | 26.5         | -8.3                  | 4.07E-191          | -9.4                  | 4.26E-60           | -4.4                  | 7.38E-277          | hypothetical protein    |
| PTTG_11639     | 4751.5      | 15.2         | 5.3          | 148.7        | -8.3                  | 0                  | -9.8                  | 3.33E-105          | -5.0                  | 0                  | hypothetical protein    |
| PTTG_03367     | 1140.8      | 3.7          | 1.7          | 5.7          | -8.3                  | 0                  | -9.4                  | 1.42E-69           | -7.6                  | 0                  | hypothetical protein    |

|            |         |      |       |        |      |           |       |           |      |           |                      |
|------------|---------|------|-------|--------|------|-----------|-------|-----------|------|-----------|----------------------|
| PTTG_05984 | 809.2   | 2.6  | 2.1   | 12.9   | -8.3 | 0         | -8.6  | 0         | -5.9 | 0         | hypothetical protein |
| PTTG_09130 | 1292.9  | 4.2  | 1.1   | 26.9   | -8.3 | 0         | -10.2 | 1.68E-78  | -5.6 | 0         | hypothetical protein |
| novel.276  | 14.0    | 0.0  | 0.0   | 0.0    | -8.3 | 1.45E-07  | -10.7 | 2.92E-18  | -9.7 | 1.44E-15  | hypothetical protein |
| PTTG_02563 | 241.3   | 0.7  | 1.7   | 3.8    | -8.2 | 2.75E-181 | -7.2  | 0         | -6.0 | 0         | Na_H_Exchanger       |
| PTTG_01246 | 1968.1  | 6.6  | 1.5   | 57.3   | -8.2 | 0         | -10.4 | 1.67E-55  | -5.1 | 0         | hypothetical protein |
| PTTG_25386 | 13548.2 | 44.7 | 9.8   | 206.6  | -8.2 | 0         | -10.4 | 4.34E-35  | -6.0 | 0         | hypothetical protein |
| PTTG_12434 | 221.1   | 0.7  | 1.0   | 6.6    | -8.2 | 7.22E-101 | -7.8  | 0         | -5.0 | 0         | Asp                  |
| PTTG_02667 | 2510.0  | 8.4  | 2.6   | 74.5   | -8.2 | 0         | -9.9  | 4.18E-68  | -5.0 | 0         | hypothetical protein |
| PTTG_02477 | 1030.0  | 3.5  | 4.8   | 34.4   | -8.2 | 0         | -7.7  | 0         | -4.9 | 0         | hypothetical protein |
| novel.1959 | 8.3     | 0.0  | 0.1   | 0.5    | -8.2 | 2.11E-07  | -6.2  | 7.27E-36  | -3.9 | 8.05E-43  | hypothetical protein |
| PTTG_11882 | 364.8   | 1.2  | 0.9   | 11.1   | -8.2 | 1.28E-166 | -8.6  | 2.14E-64  | -5.0 | 0         | hypothetical protein |
| PTTG_29552 | 14.5    | 0.0  | 0.2   | 1.3    | -8.1 | 2.69E-07  | -6.3  | 1.71E-32  | -3.5 | 4.44E-36  | hypothetical protein |
| PTTG_29176 | 9.4     | 0.0  | 0.1   | 0.2    | -8.1 | 2.65E-07  | -7.4  | 1.01E-25  | -5.3 | 2.17E-42  | hypothetical protein |
| PTTG_10214 | 295.1   | 1.0  | 1.6   | 14.0   | -8.1 | 1.64E-105 | -7.5  | 0         | -4.4 | 0         | hypothetical protein |
| PTTG_25925 | 55.9    | 0.0  | 1.3   | 2.4    | -8.1 | 2.89E-07  | -5.5  | 1.03E-38  | -4.5 | 9.00E-36  | hypothetical protein |
| PTTG_04172 | 2036.8  | 7.5  | 2.9   | 59.0   | -8.1 | 0         | -9.5  | 3.28E-154 | -5.1 | 0         | hypothetical protein |
| PTTG_04309 | 331.0   | 1.2  | 19.8  | 53.8   | -8.0 | 8.35E-136 | -4.0  | 1.98E-171 | -2.6 | 3.77E-168 | hypothetical protein |
| PTTG_00068 | 1041.4  | 3.8  | 1.3   | 45.2   | -8.0 | 0         | -9.6  | 5.89E-167 | -4.5 | 6.88E-245 | Polysacc_deac_1      |
| PTTG_28316 | 101.3   | 0.4  | 0.9   | 2.6    | -8.0 | 1.35E-32  | -6.7  | 3.02E-278 | -5.3 | 0         | hypothetical protein |
| PTTG_11955 | 57.8    | 0.2  | 0.9   | 4.5    | -8.0 | 1.40E-56  | -6.1  | 0         | -3.7 | 2.89E-201 | hypothetical protein |
| PTTG_06229 | 928.7   | 3.6  | 0.6   | 18.5   | -8.0 | 0         | -10.5 | 7.18E-68  | -5.6 | 0         | hypothetical protein |
| PTTG_04559 | 61.2    | 0.2  | 0.1   | 0.7    | -8.0 | 4.40E-20  | -8.8  | 3.34E-103 | -6.3 | 1.23E-228 | Abhydrolase_1        |
| PTTG_28485 | 226.4   | 0.9  | 1.3   | 13.4   | -8.0 | 2.13E-79  | -7.5  | 0         | -4.0 | 4.86E-277 | hypothetical protein |
| PTTG_03800 | 12980.5 | 50.0 | 10.4  | 178.8  | -8.0 | 0         | -10.3 | 4.14E-39  | -6.1 | 0         | hypothetical protein |
| PTTG_07374 | 673.4   | 2.6  | 2.1   | 25.4   | -8.0 | 1.17E-287 | -8.3  | 0         | -4.7 | 0         | hypothetical protein |
| PTTG_27099 | 11561.2 | 44.6 | 192.9 | 1015.6 | -8.0 | 0         | -5.9  | 3.07E-241 | -3.5 | 0         | hypothetical protein |

|            |         |      |       |        |      |           |       |           |      |           |                      |
|------------|---------|------|-------|--------|------|-----------|-------|-----------|------|-----------|----------------------|
| PTTG_28961 | 697.8   | 2.8  | 0.7   | 2.6    | -8.0 | 3.01E-205 | -10.0 | 0         | -8.0 | 0         | hypothetical protein |
| PTTG_00474 | 1246.4  | 4.9  | 2.0   | 38.6   | -8.0 | 0         | -9.2  | 3.44E-107 | -5.0 | 0         | hypothetical protein |
| PTTG_00275 | 19791.1 | 77.3 | 53.7  | 1329.9 | -8.0 | 0         | -8.5  | 2.98E-96  | -3.9 | 1.21E-212 | hypothetical protein |
| PTTG_00665 | 273.4   | 1.1  | 1.6   | 11.1   | -7.9 | 1.99E-121 | -7.4  | 0         | -4.6 | 0         | hypothetical protein |
| PTTG_25763 | 35.0    | 0.1  | 0.1   | 0.1    | -7.9 | 5.07E-08  | -8.4  | 2.73E-41  | -8.0 | 2.00E-49  | hypothetical protein |
| PTTG_12583 | 476.0   | 2.0  | 0.5   | 7.6    | -7.9 | 1.28E-202 | -10.0 | 0         | -5.9 | 0         | hypothetical protein |
| PTTG_04011 | 1208.8  | 5.1  | 3.2   | 43.6   | -7.9 | 0         | -8.5  | 0         | -4.8 | 0         | hypothetical protein |
| PTTG_06084 | 5953.0  | 25.4 | 7.4   | 266.5  | -7.9 | 0         | -9.6  | 6.34E-53  | -4.4 | 0         | hypothetical protein |
| PTTG_12575 | 668.1   | 3.0  | 10.6  | 49.9   | -7.9 | 8.47E-230 | -6.0  | 1.18E-42  | -3.7 | 5.55E-250 | hypothetical protein |
| PTTG_01670 | 424.3   | 1.9  | 1.2   | 24.0   | -7.8 | 1.90E-230 | -8.5  | 4.34E-97  | -4.1 | 1.47E-239 | hypothetical protein |
| PTTG_26898 | 94.9    | 0.4  | 0.1   | 2.3    | -7.8 | 3.53E-65  | -9.8  | 4.88E-29  | -5.3 | 7.98E-74  | zf-C2H2              |
| PTTG_06712 | 2131.8  | 9.2  | 12.0  | 158.5  | -7.8 | 0         | -7.5  | 0         | -3.7 | 1.83E-190 | Peptidase_S8         |
| PTTG_07626 | 3074.5  | 13.2 | 15.3  | 180.6  | -7.8 | 0         | -7.6  | 0         | -4.1 | 2.04E-261 | hypothetical protein |
| PTTG_02225 | 4386.5  | 19.3 | 6.7   | 151.5  | -7.8 | 0         | -9.3  | 1.39E-63  | -4.8 | 2.90E-306 | hypothetical protein |
| PTTG_02236 | 1189.5  | 5.1  | 1.6   | 54.8   | -7.8 | 0         | -9.5  | 7.93E-62  | -4.4 | 0         | hypothetical protein |
| novel.250  | 9.4     | 0.1  | 0.4   | 0.9    | -7.8 | 3.65E-13  | -4.5  | 2.78E-89  | -3.3 | 2.76E-101 | PIF1-like helicase   |
| PTTG_27669 | 10118.8 | 44.8 | 120.4 | 1257.4 | -7.8 | 0         | -6.4  | 0         | -3.0 | 1.17E-232 | hypothetical protein |
| PTTG_07558 | 535.9   | 2.4  | 0.4   | 2.9    | -7.8 | 1.44E-132 | -10.4 | 1.26E-43  | -7.5 | 0         | hypothetical protein |
| PTTG_09270 | 10958.9 | 49.0 | 139.8 | 1290.0 | -7.8 | 0         | -6.3  | 0         | -3.1 | 5.93E-236 | hypothetical protein |
| PTTG_06192 | 372.2   | 1.7  | 1.3   | 10.6   | -7.8 | 1.12E-41  | -8.1  | 1.67E-93  | -5.1 | 0         | hypothetical protein |
| PTTG_09713 | 45.8    | 0.3  | 1.4   | 3.3    | -7.8 | 5.07E-13  | -5.1  | 1.08E-134 | -3.7 | 3.83E-105 | hypothetical protein |
| PTTG_09156 | 10355.0 | 46.8 | 28.3  | 811.3  | -7.8 | 0         | -8.5  | 1.21E-68  | -3.6 | 3.76E-205 | hypothetical protein |
| PTTG_27630 | 116.0   | 0.5  | 1.1   | 1.2    | -7.8 | 2.07E-69  | -6.7  | 0         | -6.5 | 0         | L-ascorbate oxidase  |
| PTTG_00152 | 6051.9  | 27.6 | 50.2  | 369.9  | -7.8 | 0         | -6.9  | 0         | -4.0 | 0         | hypothetical protein |
| PTTG_04502 | 165.9   | 0.8  | 2.2   | 12.1   | -7.8 | 1.69E-144 | -6.2  | 0         | -3.7 | 3.60E-294 | hypothetical protein |
| PTTG_12685 | 103.3   | 0.5  | 0.2   | 9.9    | -7.8 | 6.67E-24  | -9.3  | 1.47E-43  | -3.4 | 2.78E-120 | zf-C2H2              |

|            |         |       |       |        |      |           |       |             |       |           |                       |
|------------|---------|-------|-------|--------|------|-----------|-------|-------------|-------|-----------|-----------------------|
| PTTG_01601 | 92.4    | 0.4   | 6.0   | 17.9   | -7.7 | 4.42E-30  | -3.9  | 4.80E-218   | -2.3  | 4.60E-72  | hypothetical protein  |
| PTTG_01334 | 11434.6 | 52.7  | 175.7 | 1266.3 | -7.7 | 0         | -6.0  | 0           | -3.1  | 6.20E-228 | hypothetical protein  |
| PTTG_07455 | 85.6    | 0.4   | 0.3   | 1.4    | -7.7 | 2.28E-24  | -8.4  | 2.59E-129   | -5.9  | 9.93E-61  | hypothetical protein  |
| PTTG_12290 | 30.8    | 0.2   | 0.5   | 2.8    | -7.7 | 1.50E-07  | -5.8  | 3.33E-60    | -3.4  | 1.81E-45  | hypothetical protein  |
| PTTG_08962 | 4009.0  | 18.9  | 7.2   | 258.3  | -7.7 | 0         | -9.1  | 4.27E-43    | -3.9  | 4.09E-208 | hypothetical protein  |
| PTTG_04054 | 598.1   | 3.0   | 0.6   | 1.6    | -7.7 | 8.37E-191 | -10.1 | 1.44E-59    | -8.5  | 0         | hypothetical protein  |
| novel.192  | 4.7     | 0.0   | 0.0   | 0.1    | -7.7 | 1.63E-06  | -9.2  | 1.40E-13    | -5.1  | 4.77E-07  | Reverse transcriptase |
| PTTG_01007 | 201.6   | 1.0   | 0.2   | 7.0    | -7.7 | 1.15E-171 | -9.8  | 3.48E-17    | -4.8  | 0         | hypothetical protein  |
| PTTG_08292 | 76.8    | 0.4   | 0.2   | 2.5    | -7.7 | 8.41E-30  | -8.4  | 5.34E-158   | -4.9  | 1.12E-302 | hypothetical protein  |
| PTTG_28414 | 709.5   | 3.4   | 1.2   | 29.8   | -7.7 | 2.92E-304 | -9.2  | 0           | -4.5  | 3.33E-254 | hypothetical protein  |
| PTTG_04998 | 327.9   | 1.5   | 3.0   | 18.5   | -7.7 | 8.51E-170 | -6.7  | 0           | -4.1  | 1.64E-254 | hypothetical protein  |
| PTTG_26873 | 585.8   | 3.0   | 1.1   | 27.9   | -7.7 | 1.07E-168 | -9.0  | 1.24E-98    | -4.4  | 2.91E-65  | hypothetical protein  |
| PTTG_04707 | 2443.6  | 11.9  | 3.4   | 88.1   | -7.7 | 0         | -9.5  | 3.67E-40    | -4.8  | 1.38E-283 | hypothetical protein  |
| PTTG_07714 | 24134.7 | 116.6 | 72.1  | 1458.5 | -7.7 | 0         | -8.4  | 4.74E-115   | -4.0  | 1.87E-203 | hypothetical protein  |
| PTTG_04712 | 1042.1  | 5.3   | 1.0   | 0.6    | -7.7 | 4.70E-245 | -10.1 | 2.10E-149   | -10.8 | 0         | hypothetical protein  |
| PTTG_08472 | 124.8   | 0.6   | 0.8   | 1.3    | -7.7 | 5.30E-102 | -7.3  | 0           | -6.6  | 0         | hypothetical protein  |
| PTTG_29284 | 375.2   | 1.8   | 1.1   | 15.5   | -7.7 | 3.28E-82  | -8.4  | 0           | -4.6  | 0         | hypothetical protein  |
| PTTG_04820 | 120.6   | 0.6   | 3.3   | 3.9    | -7.7 | 5.66E-46  | -5.2  | 6.17E-274   | -4.9  | 0         | hypothetical protein  |
| PTTG_29042 | 120.5   | 0.6   | 2.1   | 9.5    | -7.7 | 1.22E-56  | -5.8  | 0           | -3.6  | 4.57E-216 | hypothetical protein  |
| PTTG_31003 | 39.0    | 0.0   | 1.5   | 8.3    | -7.6 | 2.97E-06  | -4.6  | 0.001643943 | -2.2  | 5.31E-14  | hypothetical protein  |
| PTTG_11693 | 8847.7  | 44.6  | 46.0  | 164.5  | -7.6 | 0         | -7.6  | 0           | -5.7  | 0         | hypothetical protein  |
| PTTG_09298 | 460.5   | 2.5   | 0.4   | 15.9   | -7.6 | 1.73E-156 | -10.2 | 1.96E-51    | -4.8  | 0         | hypothetical protein  |
| PTTG_00399 | 2392.4  | 12.1  | 100.8 | 368.9  | -7.6 | 0         | -4.5  | 0           | -2.7  | 1.99E-254 | hypothetical protein  |
| PTTG_08532 | 6.4     | 0.0   | 0.3   | 1.2    | -7.6 | 2.19E-07  | -4.4  | 2.46E-67    | -2.3  | 1.49E-30  | hypothetical protein  |

**SUPPLEMENTARY TABLE S7** | Predicted effectors encoded by the co-upregulated DEGs.

| PTTG<br>accession | EffectorP<br>probability | Conserved domain (pfam)                       | GT   | 4 dpi  | 6 dpi | 8 dpi |
|-------------------|--------------------------|-----------------------------------------------|------|--------|-------|-------|
|                   |                          |                                               | FPKM | FPKM   | FPKM  | FPKM  |
| PTTG_27310        | 1.00                     | N.A.                                          | 0.2  | 184.4  | 26.2  | 33.0  |
| PTTG_26436        | 1.00                     | Protein kinase domain (PF00069)               | 25.8 | 86.9   | 95.5  | 81.9  |
| PTTG_07398        | 1.00                     | Thaumatococin (PF00314)                       | 3.6  | 62.6   | 763.6 | 386.1 |
| PTTG_00671        | 1.00                     | N.A.                                          | 0.6  | 12.3   | 3.5   | 3.9   |
| novel.559         | 1.00                     | N.A.                                          | 0.0  | 4.5    | 1.3   | 1.2   |
| novel.492         | 1.00                     | N.A.                                          | 0.0  | 6.9    | 3.1   | 3.9   |
| PTTG_07345        | 0.99                     | N.A.                                          | 3.4  | 116.9  | 11.6  | 15.2  |
| novel.1420        | 0.99                     | N.A.                                          | 0.0  | 4.6    | 0.5   | 0.9   |
| novel.1021        | 0.98                     | N.A.                                          | 0.0  | 4.0    | 0.8   | 0.7   |
| PTTG_25283        | 0.98                     | N.A.                                          | 0.0  | 14.1   | 3.9   | 3.6   |
| novel.211         | 0.97                     | N.A.                                          | 0.3  | 0.7    | 1.2   | 1.1   |
| PTTG_29714        | 0.97                     | Proteobacterial cyclic peptide (PF05887)      | 0.1  | 12.2   | 1.2   | 1.9   |
| PTTG_04629        | 0.97                     | N.A.                                          | 0.6  | 57.0   | 3.8   | 6.3   |
| novel.1545        | 0.97                     | N.A.                                          | 0.0  | 5.4    | 1.4   | 1.2   |
| PTTG_00522        | 0.97                     | N.A.                                          | 0.1  | 584.1  | 428.0 | 15.7  |
| novel.467         | 0.97                     | N.A.                                          | 0.0  | 4.7    | 1.3   | 2.5   |
| PTTG_25256        | 0.96                     | N.A.                                          | 0.0  | 1092.9 | 977.2 | 39.0  |
| PTTG_09007        | 0.96                     | N.A.                                          | 0.4  | 115.1  | 10.2  | 13.1  |
| PTTG_05834        | 0.96                     | N.A.                                          | 2.2  | 274.9  | 29.3  | 34.8  |
| PTTG_30152        | 0.95                     | N.A.                                          | 0.1  | 66.6   | 6.0   | 8.5   |
| PTTG_05844        | 0.95                     | N.A.                                          | 0.0  | 152.5  | 9.7   | 12.7  |
| novel.563         | 0.95                     | N.A.                                          | 0.0  | 36.6   | 18.3  | 13.4  |
| novel.1680        | 0.95                     | N.A.                                          | 0.3  | 4.0    | 4.1   | 5.1   |
| PTTG_00528        | 0.94                     | N.A.                                          | 0.0  | 233.5  | 361.4 | 37.7  |
| novel.1540        | 0.94                     | N.A.                                          | 0.0  | 4.8    | 0.7   | 1.4   |
| PTTG_28461        | 0.94                     | N.A.                                          | 3.0  | 28.4   | 30.2  | 26.3  |
| PTTG_28742        | 0.94                     | Protein of unknown function DUF3430 (PF11912) | 1.4  | 4.3    | 8.7   | 8.7   |
| PTTG_01781        | 0.94                     | N.A.                                          | 0.5  | 68.2   | 8.6   | 10.8  |
| PTTG_11983        | 0.93                     | Ligase Pab1020 C-terminal region (PF18330)    | 0.0  | 15.0   | 8.4   | 4.8   |
| PTTG_00114        | 0.93                     | N.A.                                          | 2.6  | 168.8  | 118.7 | 67.7  |
| novel.697         | 0.93                     | N.A.                                          | 0.0  | 1.9    | 3.0   | 3.6   |
| PTTG_03570        | 0.92                     | N.A.                                          | 0.7  | 569.6  | 61.3  | 80.4  |
| PTTG_03780        | 0.92                     | N.A.                                          | 0.2  | 169.4  | 9.5   | 15.7  |
| PTTG_11722        | 0.92                     | Apoptosis regulator M11L like (PF11099)       | 0.0  | 29.0   | 3.7   | 5.2   |
| PTTG_12651        | 0.92                     | N.A.                                          | 0.0  | 11.5   | 14.6  | 19.4  |
| PTTG_02291        | 0.91                     | N.A.                                          | 0.1  | 16.8   | 1.3   | 2.3   |
| PTTG_11720        | 0.89                     | N.A.                                          | 0.2  | 22.7   | 3.5   | 4.7   |
| novel.1404        | 0.89                     | N.A.                                          | 0.0  | 1.6    | 1.5   | 0.9   |
| PTTG_05290        | 0.89                     | N.A.                                          | 0.2  | 298.4  | 24.5  | 32.0  |
| novel.637         | 0.89                     | N.A.                                          | 0.0  | 1.6    | 0.5   | 1.9   |
| novel.1443        | 0.89                     | N.A.                                          | 0.0  | 2.8    | 2.3   | 3.1   |

|            |      |                                                  |      |       |       |       |
|------------|------|--------------------------------------------------|------|-------|-------|-------|
| novel.1252 | 0.89 | N.A.                                             | 0.0  | 2.5   | 0.4   | 0.7   |
| PTTG_05614 | 0.88 | N.A.                                             | 1.3  | 756.9 | 61.4  | 83.9  |
| PTTG_27631 | 0.88 | N.A.                                             | 0.5  | 21.2  | 2.4   | 3.7   |
| PTTG_28226 | 0.88 | Low iron-inducible periplasmic protein (PF07692) | 2.1  | 446.7 | 33.7  | 54.1  |
| PTTG_09419 | 0.88 | Myticin pre-proprotein from the mussel (PF10690) | 0.1  | 8.8   | 5.0   | 3.3   |
| PTTG_11938 | 0.87 | N.A.                                             | 0.0  | 26.3  | 2.7   | 3.2   |
| novel.473  | 0.87 | N.A.                                             | 0.0  | 3.1   | 0.4   | 1.5   |
| novel.495  | 0.86 | N.A.                                             | 0.0  | 2.6   | 2.3   | 2.2   |
| PTTG_27172 | 0.86 | N.A.                                             | 0.0  | 68.0  | 32.6  | 23.4  |
| PTTG_00307 | 0.86 | N.A.                                             | 0.3  | 30.5  | 77.9  | 46.9  |
| novel.1931 | 0.86 | N.A.                                             | 0.0  | 0.6   | 0.9   | 1.0   |
| PTTG_03497 | 0.85 | N.A.                                             | 0.3  | 79.0  | 83.4  | 58.7  |
| PTTG_29644 | 0.84 | N.A.                                             | 15.7 | 791.9 | 69.8  | 87.2  |
| novel.471  | 0.84 | N.A.                                             | 0.0  | 1.9   | 0.4   | 0.5   |
| PTTG_12427 | 0.82 | N.A.                                             | 0.0  | 11.0  | 6.4   | 7.0   |
| novel.343  | 0.82 | N.A.                                             | 0.0  | 1.7   | 1.7   | 1.9   |
| novel.472  | 0.81 | N.A.                                             | 0.0  | 5.0   | 0.9   | 1.7   |
| novel.1122 | 0.81 | N.A.                                             | 0.0  | 18.3  | 4.3   | 4.1   |
| PTTG_02768 | 0.81 | FAT domain (PF02259)                             | 0.1  | 51.2  | 55.0  | 49.4  |
| PTTG_12542 | 0.78 | Protein of unknown function DUF829 (PF05705)     | 6.5  | 60.6  | 17.1  | 15.8  |
| novel.1543 | 0.78 | N.A.                                             | 0.0  | 4.3   | 3.9   | 4.2   |
| novel.1633 | 0.77 | N.A.                                             | 0.0  | 2.0   | 0.9   | 1.3   |
| PTTG_11740 | 0.74 | Protein of unknown function DUF333 (PF03891)     | 0.1  | 295.5 | 230.3 | 170.4 |
| PTTG_03539 | 0.71 | Common central domain of tyrosinase (PF00264)    | 0.3  | 10.6  | 1.2   | 2.5   |
| PTTG_28700 | 0.70 | N.A.                                             | 31.8 | 516.3 | 73.8  | 83.8  |
| novel.92   | 0.69 | N.A.                                             | 0.0  | 4.1   | 4.6   | 5.3   |
| PTTG_05620 | 0.68 | N.A.                                             | 0.0  | 691.5 | 50.9  | 69.4  |
| PTTG_12319 | 0.65 | N.A.                                             | 0.0  | 17.7  | 10.7  | 13.6  |
| novel.626  | 0.59 | N.A.                                             | 0.0  | 9.9   | 5.1   | 5.5   |
| novel.377  | 0.59 | N.A.                                             | 0.1  | 1.1   | 1.0   | 2.8   |
| novel.846  | 0.59 | N.A.                                             | 0.0  | 1.3   | 1.9   | 1.9   |
| PTTG_12711 | 0.59 | N.A.                                             | 0.3  | 40.6  | 3.2   | 3.1   |
| PTTG_25324 | 0.57 | N.A.                                             | 2.1  | 11.4  | 7.9   | 8.1   |
| PTTG_04890 | 0.57 | N.A.                                             | 0.0  | 5.7   | 0.7   | 1.1   |
| PTTG_03168 | 0.56 | N.A.                                             | 0.6  | 344.3 | 52.9  | 46.5  |
| PTTG_12701 | 0.54 | N.A.                                             | 0.0  | 219.2 | 146.6 | 139.7 |
| PTTG_05870 | 0.53 | Protein of unknown function DUF3455 (PF11937)    | 0.0  | 6.8   | 1.4   | 1.6   |
| novel.1256 | 0.50 | N.A.                                             | 0.0  | 2.7   | 1.0   | 0.6   |

**SUPPLEMENTARY TABLE S8** | *Pt* effector candidates containing identical sequence of RXLR or a complete RXLR-dEER-like motif.

| Type                                                                | Gene accession | RXLR-dEER feature | Conserved domain (pfam)                                        | EffectorP prediction | Effector probability | GT<br>FPKM | 4 dpi<br>FPKM | 6 dpi<br>FPKM | 8 dpi<br>FPKM |
|---------------------------------------------------------------------|----------------|-------------------|----------------------------------------------------------------|----------------------|----------------------|------------|---------------|---------------|---------------|
| Secreted proteins<br>containing<br>identical<br>sequence of<br>RXLR | PTTG_26187     | RALR              | Clostridial binary toxin B/anthrax toxin PA domain 2 (PF17475) | Effector             | 0.839                | 3.06       | 38.48         | 4.67          | 6.27          |
|                                                                     | PTTG_25160     | RALR              | Clostridial binary toxin B/anthrax toxin PA domain 2 (PF17475) | Effector             | 0.837                | 11.40      | 16.55         | 3.36          | 5.56          |
|                                                                     | PTTG_27311     | RPLR              | N. A.                                                          | Effector             | 0.834                | 19.84      | 18.50         | 174.19        | 75.57         |
|                                                                     | PTTG_27487     | RQLR              | N. A.                                                          | Effector             | 0.668                | 2.21       | 0.97          | 10.18         | 12.42         |
|                                                                     | PTTG_03308     | RYLR              | 6-phosphofructo-2-kinase (PF01591)                             | Non-effector         | 0.983                | 28.75      | 35.21         | 79.15         | 81.11         |
|                                                                     | PTTG_05912     | RALR              | tRNA synthetase class II core domain (PF00587)                 | Non-effector         | 0.971                | 45.94      | 28.29         | 23.49         | 21.04         |
|                                                                     | novel.833      | RYLR-IEDK         | Ring finger domain (PF13639)                                   | Non-effector         | 0.969                | 0.00       | 3.67          | 1.57          | 1.77          |
|                                                                     | novel.861      | RSLR              | N.A.                                                           | Non-effector         | 0.955                | 0.00       | 1.75          | 1.15          | 0.76          |
|                                                                     | PTTG_05946     | RSLR              | Eukaryotic aspartyl protease (PF00026)                         | Non-effector         | 0.936                | 0.09       | 7.75          | 26.82         | 25.64         |
|                                                                     | novel.1536     | RDLR              | N.A.                                                           | Non-effector         | 0.92                 | 0.00       | 2.86          | 0.82          | 1.01          |
|                                                                     | novel.1332     | RVLR              | Trehalose-phosphatase (PF02358)                                | Non-effector         | 0.905                | 0.00       | 3.13          | 1.67          | 2.09          |
|                                                                     | PTTG_07204     | RSLR              | N.A.                                                           | Non-effector         | 0.889                | 1.12       | 118.99        | 19.70         | 21.21         |
|                                                                     | PTTG_06625     | RGLR              | Attacin N-terminal region (PF03768)                            | Non-effector         | 0.887                | 0.05       | 9.01          | 0.85          | 1.27          |
|                                                                     | PTTG_05306     | RALR              | Pectinesterase (PF01095)                                       | Non-effector         | 0.865                | 0.85       | 0.17          | 1.49          | 5.14          |
|                                                                     | PTTG_00017     | RALR              | Pectinesterase (PF01095)                                       | Non-effector         | 0.847                | 0.24       | 0.37          | 5.91          | 15.70         |
|                                                                     | PTTG_00174     | RRLR              | N.A.                                                           | Non-effector         | 0.825                | 0.00       | 57.78         | 6.17          | 9.12          |
|                                                                     | PTTG_06330     | RPLR              | N.A.                                                           | Non-effector         | 0.796                | 0.35       | 1.50          | 0.50          | 0.65          |
|                                                                     | PTTG_06020     | RPLR              | Glycosyl hydrolase family 7 (PF00840)                          | Non-effector         | 0.788                | 10.52      | 63.37         | 8.63          | 9.52          |
|                                                                     | PTTG_06205     | RPLR              | Abi-like protein (PF07751)                                     | Non-effector         | 0.741                | 0.21       | 11.00         | 5.62          | 4.52          |
|                                                                     | novel.1116     | RALR              | N.A.                                                           | Non-effector         | 0.731                | 0.00       | 0.30          | 7.20          | 6.77          |
| Secreted proteins<br>containing a                                   | PTTG_30134     | RKIT-DEDK         | N.A.                                                           | Effector             | 0.934                | 0.00       | 15.64         | 1.83          | 2.61          |
|                                                                     | PTTG_29433     | KVLA-YDEK         | N.A.                                                           | Effector             | 0.738                | 0.00       | 11.93         | 1.57          | 2.14          |



|                |            |           |                                                 |              |       |        |        |        |        |
|----------------|------------|-----------|-------------------------------------------------|--------------|-------|--------|--------|--------|--------|
| complete       | PTTG_12320 | RPLL-PEEK | N.A.                                            | Effector     | 0.64  | 0.77   | 8.29   | 4.82   | 5.00   |
| RXLR-dEER-like | PTTG_12434 | KDFQ-TDEK | Eukaryotic aspartyl protease (PF00026)          | Non-effector | 0.971 | 221.06 | 0.72   | 1.00   | 6.58   |
| motif          | PTTG_09121 | RSIT-PDER | Glycosyl Hydrolase Family 88 (PF07470)          | Non-effector | 0.911 | 0.00   | 8.67   | 3.05   | 3.01   |
|                | PTTG_30127 | RAFF-PDDK | N.A.                                            | Non-effector | 0.907 | 0.00   | 0.00   | 0.04   | 0.02   |
|                | novel.6    | RYMF-LDEK | N.A.                                            | Non-effector | 0.829 | 0.00   | 3.44   | 1.31   | 1.50   |
|                | PTTG_12224 | HDLA-IEER | Ring finger domain (PF13639)                    | Non-effector | 0.759 | 16.07  | 1.99   | 4.47   | 5.30   |
|                | PTTG_26127 | HLLL-EDER | Peptidase inhibitor I9 (PF05922, insignificant) | Non-effector | 0.703 | 850.83 | 324.61 | 330.58 | 467.76 |

**SUPPLEMENTARY TABLE S9** | Genome-wide prediction of CRN-like effector candidates from the wheat leaf rust fungus.

| Accession  | CRN feature | EffectorP         | Probability | Conserved domain (pfam)                                              | GT FPKM | 4 dpi FPKM | 6 dpi FPKM | 8 dpi FPKM |
|------------|-------------|-------------------|-------------|----------------------------------------------------------------------|---------|------------|------------|------------|
| OAV94948.1 | LLLAK       | Effector          | 0.762       | SelR domain (PF01641)                                                | N.A.    | N.A.       | N.A.       | N.A.       |
| PTTG_06512 | LRFKN       | Effector          | 0.744       | Thaumatococcus (PF00314)                                             | 292.6   | 14.0       | 41.1       | 147.1      |
| novel.300  | LFFAR       | Effector          | 0.728       | N.A.                                                                 | 0.0     | 0.3        | 1.7        | 1.2        |
| PTTG_28213 | LFLAN       | Effector          | 0.718       | N.A.                                                                 | 3.6     | 0.5        | 1.8        | 2.3        |
| PTTG_28846 | LLKAK       | Effector          | 0.674       | Cleavage stimulation factor subunit 1, dimerisation domain (PF16699) | 0.0     | 40.4       | 5.8        | 5.1        |
| PTTG_02142 | LLLKN       | Effector          | 0.598       | Polysaccharide deacetylase (PF01522)                                 | 0.1     | 3.9        | 20.4       | 167.0      |
| novel.910  | LLFRK       | Non-effector      | 0.971       | N.A.                                                                 | 0.0     | 5.4        | 3.2        | 2.9        |
| PTTG_02264 | LYLKR       | Non-effector      | 0.969       | N.A.                                                                 | 2298.9  | 107.8      | 51.3       | 236.5      |
| PTTG_12453 | LRKVK       | Non-effector      | 0.969       | DDHD domain (PF02862)                                                | 0.0     | 21.1       | 6.8        | 5.7        |
| novel.837  | LFLKK       | Non-effector      | 0.956       | N.A.                                                                 | 0.0     | 1.1        | 0.8        | 1.3        |
| PTTG_07031 | LLLAR       | Non-effector      | 0.908       | N.A.                                                                 | 0.1     | 22.3       | 2.3        | 3.8        |
| PTTG_03567 | LRFAN       | Non-effector      | 0.906       | Carboxylesterase family (PF00135)                                    | 11.2    | 1.9        | 43.3       | 50.8       |
| PTTG_12337 | LLKTR       | Non-effector      | 0.844       | N.A.                                                                 | 266.5   | 85.1       | 71.1       | 71.2       |
| PTTG_29375 | LFLKN       | Non-effector      | 0.843       | N.A.                                                                 | 0.0     | 0.0        | 0.0        | 0.0        |
| PTTG_03055 | LFLKN       | Non-effector      | 0.751       | N.A.                                                                 | 0.4     | 1.0        | 0.6        | 0.6        |
| PTTG_08596 | LLLAN       | Non-effector      | 0.739       | Peptidase C13 family (PF01650)                                       | 53.4    | 33.7       | 32.9       | 32.2       |
| PTTG_25398 | LLFRR       | Non-effector      | 0.571       | N.A.                                                                 | 0.0     | 0.0        | 0.0        | 0.0        |
| PTTG_00399 | LLLRR       | Non-effector      | 0.509       | Lytic transglycolase DPBB_1 (PF03330)                                | 2392.4  | 12.1       | 100.8      | 368.9      |
| PTTG_25292 | LRLRN       | Unlikely effector | 0.502       | N.A.                                                                 | 0.0     | 0.0        | 0.5        | 7.3        |

**SUPPLEMENTARY TABLE S10** | Genome-wide prediction of Y/F/WxC effector candidates from the wheat leaf rust fungus.

| Gene accession | Y/F/WxC feature | EffectorP prediction | Effector probability | Conserved domain (pfam)                                                                                                 | GT FPKM | 4 dpi FPKM | 6 dpi FPKM | 8 dpi FPKM |
|----------------|-----------------|----------------------|----------------------|-------------------------------------------------------------------------------------------------------------------------|---------|------------|------------|------------|
| PTTG_25531     | FVC             | Effector             | 0.985                | N.A.                                                                                                                    | 4.81    | 1.05       | 3.72       | 4.22       |
| PTTG_25337     | YTC             | Effector             | 0.982                | N.A.                                                                                                                    | 1.11    | 0.93       | 1.14       | 2.05       |
| PTTG_26924*    | FKC             | Effector             | 0.979                | N.A.                                                                                                                    | 5.10    | 0.00       | 1.83       | 2.83       |
| PTTG_26924     | FkC             | Effector             | 0.979                | N.A.                                                                                                                    | 5.10    | 0.00       | 1.83       | 2.83       |
| PTTG_28926     | FHC             | Effector             | 0.978                | N.A.                                                                                                                    | 1.22    | 0.67       | 1.59       | 1.08       |
| PTTG_27706     | FNC             | Effector             | 0.978                | N.A.                                                                                                                    | 0.00    | 0.00       | 0.00       | 0.00       |
| PTTG_26781     | YRC             | Effector             | 0.978                | Kyakuja-Dileera-Zisupton transposase (PF18758)<br>CxCl like cysteine cluster associated with KDZ transposases (PF18802) | 0.00    | 0.00       | 0.09       | 0.10       |
| PTTG_12170*    | FGC             | Effector             | 0.973                | Saposisin A-type domain (PF02199)                                                                                       | 0.00    | 1.14       | 2.27       | 1.71       |
| PTTG_27731     | FTC             | Effector             | 0.964                | N.A.                                                                                                                    | 0.00    | 18.45      | 1.59       | 2.13       |
| PTTG_26049     | FKC             | Effector             | 0.963                | N.A.                                                                                                                    | 0.00    | 0.00       | 0.00       | 0.00       |
| PTTG_11646     | FGC             | Effector             | 0.961                | N.A.                                                                                                                    | 4.08    | 148.33     | 10.35      | 15.34      |
| PTTG_07455     | FSC             | Effector             | 0.961                | N.A.                                                                                                                    | 85.57   | 0.41       | 0.26       | 1.44       |
| PTTG_29960     | FiC             | Effector             | 0.96                 | NADH-ubiquinone oxidoreductase B18 subunit (PF05676)                                                                    | 3.58    | 7.62       | 6.18       | 4.63       |
| PTTG_07625     | WTC             | Effector             | 0.956                | N.A.                                                                                                                    | 0.00    | 0.74       | 35.30      | 796.90     |
| PTTG_27734     | FTC             | Effector             | 0.955                | N.A.                                                                                                                    | 0.00    | 6.66       | 0.65       | 1.19       |
| PTTG_26097     | FLC             | Effector             | 0.949                | N.A.                                                                                                                    | 0.00    | 16.51      | 2.41       | 3.33       |
| PTTG_12486     | FGC             | Effector             | 0.949                | N.A.                                                                                                                    | 0.72    | 77.51      | 8.64       | 12.86      |
| PTTG_26097     | FIC             | Effector             | 0.949                | N.A.                                                                                                                    | 0.00    | 16.51      | 2.41       | 3.33       |
| PTTG_29974     | FkC             | Effector             | 0.947                | N.A.                                                                                                                    | 2.70    | 1.03       | 0.71       | 0.46       |
| PTTG_27769     | FIC             | Effector             | 0.946                | N.A.                                                                                                                    | 0.55    | 11.90      | 2.14       | 2.36       |
| PTTG_26789     | FLC             | Effector             | 0.944                | N.A.                                                                                                                    | 0.00    | 14.19      | 1.81       | 2.56       |

|             |     |          |       |                                                               |         |        |        |        |
|-------------|-----|----------|-------|---------------------------------------------------------------|---------|--------|--------|--------|
| PTTG_26851  | YTC | Effector | 0.942 | N.A.                                                          | 3.31    | 0.66   | 0.42   | 0.32   |
| PTTG_27529  | FQC | Effector | 0.94  | N.A.                                                          | 0.22    | 0.00   | 0.09   | 0.08   |
| PTTG_28066  | FHC | Effector | 0.935 | N.A.                                                          | 0.08    | 0.63   | 2.75   | 13.68  |
| PTTG_30134* | FLC | Effector | 0.934 | N.A.                                                          | 0.00    | 15.64  | 1.83   | 2.61   |
| PTTG_25725  | FSC | Effector | 0.93  | N.A.                                                          | 0.71    | 20.66  | 2.68   | 3.89   |
| PTTG_25944  | WVC | Effector | 0.925 | N.A.                                                          | 0.10    | 10.66  | 4.58   | 5.19   |
| OAV89437.1  | FTC | Effector | 0.923 | Copper/zinc superoxide dismutase (PF00080)                    | N.A.    | N.A.   | N.A.   | N.A.   |
| PTTG_25978  | FQC | Effector | 0.92  | N.A.                                                          | 0.00    | 14.44  | 1.56   | 2.81   |
| PTTG_12285  | YPC | Effector | 0.918 | N.A.                                                          | 0.53    | 6.22   | 1.50   | 1.91   |
| PTTG_26897  | YTC | Effector | 0.912 | N.A.                                                          | 0.88    | 1.45   | 3.63   | 6.26   |
| PTTG_26481  | YMC | Effector | 0.911 | N.A.                                                          | 0.08    | 0.00   | 0.00   | 0.25   |
| PTTG_12428  | FLC | Effector | 0.909 | N.A.                                                          | 1.36    | 1.68   | 2.33   | 2.23   |
| PTTG_26886  | FVC | Effector | 0.904 | N.A.                                                          | 0.46    | 36.42  | 2.91   | 4.94   |
| PTTG_12223  | FSC | Effector | 0.903 | N.A.                                                          | 0.52    | 69.14  | 17.04  | 21.77  |
| PTTG_29256  | YRC | Effector | 0.902 | N.A.                                                          | 24.83   | 40.33  | 28.60  | 22.67  |
| PTTG_04647  | YVC | Effector | 0.899 | Tuberculosis necrotizing toxin (PF14021)                      | 5.92    | 0.44   | 31.83  | 43.74  |
| PTTG_11693* | FTC | Effector | 0.896 | N.A.                                                          | 8847.69 | 44.60  | 46.04  | 164.49 |
| PTTG_11690  | FHC | Effector | 0.886 | DNA damage repair protein Nbs1 (PF08599)                      | 8.94    | 286.57 | 43.10  | 46.43  |
| PTTG_26875  | FQC | Effector | 0.88  | N.A.                                                          | 0.46    | 36.42  | 2.91   | 4.94   |
| PTTG_27704  | FNC | Effector | 0.868 | N.A.                                                          | 1181.74 | 349.34 | 299.08 | 264.99 |
| PTTG_12335  | YAC | Effector | 0.862 | Nudix N-terminal (PF14803)                                    | 0.00    | 34.21  | 4.12   | 5.44   |
| PTTG_28714  | FAC | Effector | 0.859 | N.A.                                                          | 1.72    | 1.59   | 1.97   | 2.13   |
| PTTG_28018  | FSC | Effector | 0.856 | N.A.                                                          | 0.81    | 0.64   | 1.82   | 3.38   |
| PTTG_27646  | FAC | Effector | 0.855 | N.A.                                                          | 0.00    | 0.00   | 0.00   | 0.03   |
| PTTG_28085  | YTC | Effector | 0.851 | N.A.                                                          | 5.45    | 3.45   | 2.97   | 2.25   |
| PTTG_27501  | FRC | Effector | 0.851 | Co-chaperone HscB tetracysteine metal binding motif (PF18256) | 0.09    | 0.20   | 0.60   | 0.11   |

|             |     |          |       |                                                                    |         |         |        |        |
|-------------|-----|----------|-------|--------------------------------------------------------------------|---------|---------|--------|--------|
| PTTG_26059  | FFC | Effector | 0.851 | Cysteine-rich KTR (PF14205)                                        | 0.13    | 0.00    | 0.14   | 0.51   |
| OAV88435.1  | FAC | Effector | 0.846 | CFEM domain (PF05730)                                              | N.A.    | N.A.    | N.A.   | N.A.   |
| PTTG_12171* | FgC | Effector | 0.846 | Saposin A-type domain (PF02199)                                    | 6.26    | 367.81  | 56.87  | 46.53  |
| PTTG_27027  | YYC | Effector | 0.842 | N.A.                                                               | 1.35    | 5.82    | 2.98   | 4.67   |
| PTTG_25982  | FSC | Effector | 0.841 | N.A.                                                               | 3.23    | 69.99   | 357.36 | 261.70 |
| PTTG_12547  | FKC | Effector | 0.838 | N.A.                                                               | 0.00    | 6.70    | 1.63   | 4.67   |
| PTTG_12430  | FVC | Effector | 0.838 | N.A.                                                               | 10.64   | 117.24  | 29.78  | 32.90  |
| PTTG_27318  | FTC | Effector | 0.837 | N.A.                                                               | 32.13   | 137.73  | 24.77  | 32.99  |
| PTTG_09595  | YTC | Effector | 0.836 | Ring finger domain (PF13639)                                       | 0.00    | 13.57   | 5.79   | 6.26   |
| PTTG_25672  | FKC | Effector | 0.835 | N.A.                                                               | 242.80  | 6.07    | 0.61   | 1.94   |
| PTTG_12548  | YTC | Effector | 0.83  | N.A.                                                               | 0.00    | 93.53   | 13.40  | 19.22  |
| PTTG_27897  | FLC | Effector | 0.827 | N.A.                                                               | 0.11    | 14.59   | 9.55   | 13.49  |
| OAV93485.1  | FTC | Effector | 0.818 | Copper/zinc superoxide dismutase (PF00080)                         | N.A.    | N.A.    | N.A.   | N.A.   |
| PTTG_12508  | FDC | Effector | 0.815 | N.A.                                                               | 0.00    | 1.05    | 0.03   | 0.08   |
| PTTG_28532  | FKC | Effector | 0.811 | N.A.                                                               | 0.05    | 0.13    | 0.16   | 0.08   |
| OAV94494.1  | FLC | Effector | 0.808 | Copper/zinc superoxide dismutase (PF00080)                         | N.A.    | N.A.    | N.A.   | N.A.   |
| PTTG_12290  | FIC | Effector | 0.8   | N.A.                                                               | 30.80   | 0.18    | 0.53   | 2.78   |
| PTTG_27640  | FSC | Effector | 0.791 | N.A.                                                               | 0.91    | 1.58    | 0.09   | 0.09   |
| PTTG_29573  | FVC | Effector | 0.783 | Low molecular weight phosphotyrosine protein phosphatase (PF01451) | 637.68  | 80.98   | 163.16 | 215.65 |
| PTTG_27737  | FPC | Effector | 0.78  | N.A.                                                               | 1.52    | 24.12   | 26.01  | 23.04  |
| PTTG_26493  | WGC | Effector | 0.778 | N.A.                                                               | 0.00    | 12.56   | 3.10   | 7.64   |
| PTTG_25677  | WVC | Effector | 0.773 | N.A.                                                               | 0.09    | 0.00    | 0.25   | 0.19   |
| PTTG_25643* | FKC | Effector | 0.769 | N.A.                                                               | 1190.92 | 2153.13 | 116.61 | 174.89 |
| PTTG_12078  | FRC | Effector | 0.76  | N.A.                                                               | 0.00    | 0.83    | 37.47  | 112.54 |
| OAV89542.1  | FAC | Effector | 0.754 | Copper/zinc superoxide dismutase (PF00080)                         | N.A.    | N.A.    | N.A.   | N.A.   |
| novel.470   | WKC | Effector | 0.746 | N.A.                                                               | 0.00    | 2.01    | 0.77   | 1.13   |

|             |     |              |       |                                               |         |         |         |         |
|-------------|-----|--------------|-------|-----------------------------------------------|---------|---------|---------|---------|
| novel.473   | WGC | Effector     | 0.739 | Acyl-protein synthetase LuxE (PF04443)        | 0.00    | 3.09    | 0.39    | 1.46    |
| PTTG_25377  | YIC | Effector     | 0.733 | Protein of unknown function DUF1579 (PF07617) | 1162.67 | 1456.63 | 1168.90 | 1103.68 |
| PTTG_10137  | YHC | Effector     | 0.719 | Ubiquitin-Binding Zinc Finger (PF18439)       | 0.09    | 2.67    | 2.91    | 3.31    |
| novel.343   | FTC | Effector     | 0.708 | N.A.                                          | 0.00    | 1.73    | 1.70    | 1.90    |
| PTTG_25357  | WSC | Effector     | 0.692 | N.A.                                          | 9.37    | 3.68    | 5.36    | 7.69    |
| PTTG_05870  | YKC | Effector     | 0.677 | Protein of unknown function DUF3455 (PF11937) | 0.00    | 6.76    | 1.39    | 1.64    |
| PTTG_04698  | FIC | Effector     | 0.677 | N.A.                                          | 0.05    | 14.26   | 12.04   | 17.38   |
| PTTG_10813  | YTC | Effector     | 0.676 | N.A.                                          | 0.00    | 0.00    | 0.00    | 0.00    |
| PTTG_12601  | FTC | Effector     | 0.665 | N.A.                                          | 5.92    | 0.44    | 31.83   | 43.74   |
| PTTG_12311  | FGC | Effector     | 0.663 | N.A.                                          | 1214.30 | 9.39    | 6.13    | 205.71  |
| PTTG_28678* | FRC | Effector     | 0.647 | N.A.                                          | 0.19    | 0.16    | 11.11   | 7.16    |
| PTTG_27148  | YYC | Effector     | 0.64  | N.A.                                          | 3.69    | 4.10    | 36.77   | 74.96   |
| PTTG_00015  | YTC | Effector     | 0.636 | Polysaccharide deacetylase (PF01522)          | 25.10   | 2.00    | 1.97    | 4.22    |
| PTTG_28615* | FRC | Effector     | 0.634 | N.A.                                          | 0.10    | 0.00    | 2.72    | 1.68    |
| PTTG_08463  | YRC | Effector     | 0.629 | N.A.                                          | 0.18    | 3.14    | 1.74    | 2.39    |
| PTTG_26534  | YVC | Effector     | 0.582 | Protein of unknown function DUF3455 (PF11937) | 42.84   | 1.99    | 34.84   | 21.65   |
| PTTG_28361  | WSC | Effector     | 0.576 | N.A.                                          | 14.32   | 744.44  | 348.97  | 444.79  |
| PTTG_11647  | FTC | Effector     | 0.573 | N.A.                                          | 0.00    | 9.22    | 0.94    | 1.49    |
| PTTG_12313  | FHC | Effector     | 0.567 | Protein of unknown function DUF2012 (PF09430) | 79.36   | 63.88   | 45.04   | 41.90   |
| PTTG_28678  | FrC | Effector     | 0.647 | N.A.                                          | 0.19    | 0.16    | 11.11   | 7.16    |
| PTTG_25359  | WSC | Non-effector | 0.99  | N.A.                                          | 1.28    | 1.29    | 0.48    | 1.12    |
| PTTG_07660  | FLC | Non-effector | 0.99  | N.A.                                          | 0.06    | 0.25    | 7.07    | 7.07    |
| PTTG_03170  | FNC | Non-effector | 0.99  | ABC-2 type transporter (PF01061)              | 53.85   | 14.99   | 20.23   | 21.23   |
|             |     |              |       | ABC transporter (PF00005)                     |         |         |         |         |
| PTTG_02527  | YEC | Non-effector | 0.989 | Organic solute transporter Ostalpha (PF03619) | 83.96   | 70.03   | 62.90   | 54.25   |
| PTTG_01125  | FIC | Non-effector | 0.989 | CFEM domain (PF05730)                         | 375.99  | 88.83   | 7.41    | 12.57   |

|            |     |              |       |                                                               |         |        |        |        |
|------------|-----|--------------|-------|---------------------------------------------------------------|---------|--------|--------|--------|
| PTTG_28724 | FGC | Non-effector | 0.988 | Alpha galactosidase A (PF16499)                               | 0.00    | 20.06  | 2.05   | 3.26   |
|            |     |              |       | Alpha galactosidase C-terminal beta sandwich domain (PF17801) |         |        |        |        |
| PTTG_25440 | FAC | Non-effector | 0.98  | FAD binding domain (PF01565)                                  | 3.50    | 0.30   | 0.43   | 1.76   |
|            |     |              |       | Berberine and berberine like (PF08031)                        |         |        |        |        |
| OAV91726.1 | YSC | Non-effector | 0.97  | Hsp70 protein (PF00012)                                       | N.A.    | N.A.   | N.A.   | N.A.   |
| PTTG_01990 | YTC | Non-effector | 0.957 | Polysaccharide deacetylase (PF01522)                          | 1411.39 | 79.13  | 104.66 | 182.52 |
| novel.1172 | FSC | Non-effector | 0.955 | N.A.                                                          | 0.00    | 2.98   | 1.64   | 1.51   |
| novel.802  | YEC | Non-effector | 0.937 | N.A.                                                          | 0.00    | 2.56   | 1.44   | 0.98   |
| PTTG_02533 | YTC | Non-effector | 0.935 | Ribosome receptor lysine/proline rich region (PF05104)        | 0.80    | 0.40   | 1.75   | 4.16   |
| PTTG_07846 | WFC | Non-effector | 0.918 | Dyp-type peroxidase family (PF04261)                          | 280.15  | 1.98   | 1.95   | 32.18  |
| PTTG_26466 | YAC | Non-effector | 0.914 | Jumping translocation breakpoint protein (PF05439)            | 46.73   | 116.59 | 105.29 | 107.75 |
| PTTG_00013 | FNC | Non-effector | 0.893 | Hepatitis C virus core protein (PF01542)                      | 0.82    | 1.73   | 1.86   | 3.90   |
|            |     |              |       | Glycosyl hydrolase family 61 (PF03443)                        |         |        |        |        |
| PTTG_08384 | FVC | Non-effector | 0.88  | CFEM domain (PF05730)                                         | 0.00    | 11.16  | 1.77   | 2.96   |
|            |     |              |       | N.A.                                                          | 0.00    | 6.53   | 8.48   | 7.78   |
| PTTG_28635 | WLC | Non-effector | 0.865 | CFEM domain (PF05730)                                         | 1158.27 | 539.55 | 275.46 | 205.49 |
| PTTG_04059 | FAC | Non-effector | 0.795 | N.A.                                                          | 9.03    | 0.94   | 1.59   | 15.96  |
| PTTG_02022 | WMC | Non-effector | 0.781 | N.A.                                                          | 0.13    | 0.00   | 0.06   | 0.10   |
| PTTG_27779 | YPC | Non-effector | 0.78  | Protein of unknown function DUF2909 (PF11137)                 | 0.00    | 31.99  | 54.90  | 39.41  |
| PTTG_25295 | FLC | Non-effector | 0.78  | Protein of unknown function DUF1989 (PF09347)                 | 1.94    | 111.12 | 415.90 | 515.52 |
| PTTG_02013 | WMC | Non-effector | 0.778 | Alpha galactosidase A (PF16499)                               | 1667.96 | 46.25  | 72.28  | 76.16  |
|            |     |              |       | Alpha galactosidase C-terminal beta sandwich domain (PF17801) |         |        |        |        |
| PTTG_00700 | YGC | Non-effector | 0.755 | Cnl2/NKP2 family protein (PF09447)                            | 0.00    | 0.35   | 0.72   | 0.90   |
| PTTG_29136 | FIC | Non-effector | 0.751 | N.A.                                                          | 0.00    | 0.00   | 0.04   | 0.00   |
| PTTG_08814 | FKC | Non-effector | 0.734 | Glycosyl hydrolases family 18 (PF00704)                       | 333.53  | 1.98   | 5.16   | 14.40  |
| PTTG_08963 | WWC | Non-effector | 0.679 | Protein of unknown function DUF3836 (PF12930)                 | 0.08    | 0.00   | 0.15   | 0.12   |
| PTTG_30788 | FKC | Non-effector | 0.672 |                                                               |         |        |        |        |

|             |     |                   |       |                                                   |        |        |        |        |
|-------------|-----|-------------------|-------|---------------------------------------------------|--------|--------|--------|--------|
| PTTG_28949  | FVC | Non-effector      | 0.668 | CFEM domain (PF05730)                             | 0.06   | 0.75   | 0.76   | 0.86   |
| PTTG_28156  | WCC | Non-effector      | 0.65  | N.A.                                              | 0.00   | 9.26   | 16.91  | 20.96  |
| PTTG_27608  | WAC | Non-effector      | 0.64  | N.A.                                              | 34.04  | 76.61  | 169.70 | 130.81 |
| PTTG_27798  | FFC | Non-effector      | 0.636 | N.A.                                              | 182.40 | 54.87  | 68.75  | 69.05  |
| PTTG_08285  | YPC | Non-effector      | 0.635 | Follistatin/Osteonectin-like EGF domain (PF09289) | 2.91   | 7.43   | 18.19  | 32.30  |
| PTTG_05502  | WGC | Non-effector      | 0.615 | N.A.                                              | 9.02   | 4.57   | 3.78   | 4.58   |
| PTTG_26417  | FCC | Non-effector      | 0.61  | N.A.                                              | 1.54   | 3.44   | 5.00   | 5.66   |
| PTTG_29231  | YSC | Non-effector      | 0.589 | N.A.                                              | 15.75  | 11.87  | 10.93  | 11.14  |
| PTTG_25926  | FDC | Non-effector      | 0.582 | N.A.                                              | 0.00   | 0.00   | 0.00   | 0.00   |
| PTTG_00613  | FEC | Non-effector      | 0.58  | N.A.                                              | 566.59 | 88.65  | 154.11 | 172.90 |
| PTTG_28636  | WLC | Non-effector      | 0.557 | N.A.                                              | 0.00   | 1.52   | 2.56   | 1.91   |
| PTTG_00286  | WGC | Non-effector      | 0.535 | N.A.                                              | 22.70  | 16.58  | 32.72  | 31.23  |
| novel.1931  | WLC | Non-effector      | 0.527 | ABC transporter (PF00005)                         | 0.04   | 0.64   | 0.87   | 1.03   |
| novel.540   | FHC | Non-effector      | 0.518 | N.A.                                              | 0.00   | 0.05   | 0.13   | 0.11   |
| PTTG_26761  | FNC | Non-effector      | 0.504 | WD domain, G-beta repeat (PF00400)                | 0.00   | 0.00   | 0.00   | 0.00   |
| PTTG_28319  | FPC | Non-effector      | 0.503 | gag-polypeptide of LTR copia-type (PF14223)       | 3.32   | 2.04   | 2.19   | 1.72   |
|             |     |                   |       | Zinc knuckle (PF00098)                            |        |        |        |        |
| PTTG_09706  | YTC | Unlikely effector | 0.536 | N.A.                                              | 0.00   | 98.73  | 10.41  | 16.64  |
| PTTG_11739* | FKC | Unlikely effector | 0.52  | N.A.                                              | 1.97   | 502.64 | 31.80  | 48.26  |

\* Effector candidates selected for gene cloning and initial functional characterization.
